1 Naturally secreted bacterial outer membrane vesicles: potential platform for a vaccine  
2 against *Campylobacter jejuni*  
3  
4

5  
6  
7  
8 Ankita Singh<sup>a</sup>, Afruja Khan<sup>a</sup>, Tamal Ghosh<sup>a</sup>, Samiran Mondal<sup>b</sup> and Amirul Islam Mallick<sup>a\*</sup>

9 <sup>a</sup> Department of Biological Sciences, Indian Institute of Science Education and Research  
10 Kolkata, Mohanpur, Nadia, West Bengal-741246, India

11 <sup>b</sup> Department of Veterinary Pathology, West Bengal University of Animal and Fishery  
12 Sciences, Belgachia, Kolkata, West Bengal-700037, India  
13

14 \*Corresponding Author

15 *Corresponding Author's Address:*

16 Dr. Amirul Islam Mallick, Associate Professor, Department of Biological Sciences, Indian  
17 Institute of Science Education and Research Kolkata, Mohanpur, Nadia, West Bengal, 741246,  
18 India. Phone: **+91 033 2502 8000** (Ext 1221) Fax: +91-33-2502 8002. E-mail  
19 [amallick@iiserkol.ac.in](mailto:amallick@iiserkol.ac.in)  
20  
21  
22  
23  
24  
25

26 **Abstract**

27 Acute diarrheal illness and gastroenteritis caused by *Campylobacter jejuni* (*C. jejuni*) infection  
28 remain significant public health risks in developing countries with substantial mortality and  
29 morbidity in humans, particularly in children under the age of five. Despite improved global  
30 awareness in sanitation and hygiene practices, including food safety measures, *C. jejuni*  
31 infections continue to rise even across the developed nations and no vaccine is currently  
32 available for humans. Genetic diversities among *C. jejuni* strains as well as limited  
33 understanding of immunological correlates of host protection remain primary impediments for  
34 developing an effective vaccine against *C. jejuni*. Given the role of bacterial outer membrane-  
35 associated proteins in intestinal adherence and invasion as well as modulating dynamic  
36 interplay between host and pathogens, bacterial outer membrane vesicles (OMVs) have  
37 emerged as potential vaccine platforms against a number of enteric pathogens, including *C.*  
38 *jejuni*. In the present study, we describe a mucosal vaccine strategy using chitosan (CS) coated  
39 OMVs (CS-OMVs) to induce specific immune responses against *C. jejuni* in mice. However,  
40 considering the challenges of mucosal delivery of OMVs in terms of exposure to variable pH,  
41 risk of enzymatic degradation, rapid gut transit, and low permeability across the intestinal  
42 epithelium, we preferentially used CS as a non-toxic, mucoadhesive polymer to coat OMVs.  
43 Mucosal administration of CS-OMVs induced high titre of systemic (IgG) and local (secretory  
44 IgA) antibodies in mice. The neutralizing ability of secretory IgA (sIgA) produced in the  
45 intestine was confirmed by *in vitro* inhibition of cell adherence and invasion of *C. jejuni* while  
46 *in vivo* challenge study in OMVs immunized mice showed a significant reduction in cecal  
47 colonization of *C. jejuni*. Moreover, to investigate the immunological correlates of the observed  
48 protection, present data suggest OMVs driven T cell proliferation with an increased population  
49 of CD4<sup>+</sup> and CD8<sup>+</sup> T cells. In addition to antibody isotype profile, significant upregulation of  
50 IFN- $\gamma$  and IL-6 gene expression in mesenteric lymph nodes collected from OMVs immunized

51 mice further suggests that mucosal delivery of OMVs promotes a Th1/Th2 mixed type immune  
52 responses. Together, we provide strong experimental evidence that as an acellular and non-  
53 replicating canonical end product of bacterial secretion, mucosal delivery of OMVs may  
54 represent a promising platform for developing an effective vaccine against *C. jejuni*.

55

56 **Key words:** *C. jejuni*, Immune-protection, Mucosal vaccine, Outer Membrane Vesicles

57

58

59

60

61

62

63

64

65

66

67

68

69

70

71

72

73

74

75

76 **Author Summary**

77 Despite the loss of 7.5 million disability-adjusted life years, which is over and above any other  
78 globally prevalent enteric or enterotoxigenic pathogens, *C. jejuni* remains a neglected  
79 foodborne pathogen, particularly in tropical countries. Even with the improved global  
80 awareness in sanitation and hygiene practices, including food safety measures *C. jejuni*  
81 infections continue to rise globally and no vaccine is currently available for humans. In light  
82 of the importance of the diverse cargo selection by bacterial OMVs, the present study describes  
83 a mucosal vaccine strategy using chitosan-coated OMVs to induce specific immune responses  
84 against *C. jejuni* in mice. We provide here strong experimental evidence that as a non-  
85 replicating canonical end product of bacterial secretion, mucosal delivery of OMVs represents  
86 an attractive vaccine platform against *C. jejuni*.

87

88

89

90

91

92

93

94

95

96

97

98

99

100

101 **Introduction**

102 *Campylobacter jejuni* (*C. jejuni*) is a common etiological agent associated with an acute, self-  
103 limited gastrointestinal illness characterized by diarrhea, fever with several extraintestinal  
104 complications such as Guillain-Barre Syndrome (GBS), Reactive Arthritis (RA), Inflammatory  
105 Bowel Disease (IBD) [1–3]. Despite the concerted effort over the past two decades towards  
106 developing an effective strategy to control *C. jejuni* transmission to humans, except for  
107 biosecurity measures, no vaccine is currently available [4,5]. Moreover, the alarming trends in  
108 the rapid emergence of antibiotic resistance among *C. jejuni* have essentially entailed the need  
109 for innovative approaches towards developing an effective vaccine platform against *C. jejuni*  
110 [6–8]. Such a platform should base on a clear rationale for choosing the immunological and  
111 microbial biomarkers that are directly involved in host-pathogen interaction. To this end,  
112 bacterial outer membrane vehicles (OMVs) are known to carry diverse cargoes, including  
113 proteins that are actively associated with bacterial adhesion and invasion to participate in  
114 dynamic interplay at the host-pathogen interface [9–13].

115 As a generalized constitutive secretion system, in addition to the outer membrane and  
116 periplasmic contents, OMVs often carry nucleic acids, toxins, virulence factors as intrinsic  
117 secretory components [9, 14–20]. To venture the function of OMVs in bacterial infections and  
118 communication, recent proteomic analysis of *C. jejuni* OMVs have identified more than 150  
119 proteins, including periplasmic, outer membrane-associated, inner-membrane as well as  
120 cytoplasmic proteins [9–12]. Importantly, protected within a lipid bilayer, OMVs content often  
121 survives longer in harsh extracellular environments than the free form of macromolecules  
122 released through other secretory mechanisms. Therefore, as an acellular and non-replicating  
123 canonical end product of bacterial secretion, the use of naturally secreted OMVs could be a  
124 step forward to a potential vaccine platform against many gut pathogens including *C. jejuni* [9,  
125 21–23].

126 Because as a mucosal pathogen, *C. jejuni* primarily adhere and replicate in the intestinal  
127 epithelial cells and a strong local immune response at the mucosal surface is crucial for  
128 effective control of *C. jejuni*, we specifically focused our efforts to develop a mucosally  
129 deliverable immunization modality in a murine model [24]. However, vaccines targeting  
130 mucosal surfaces are often challenging because of the risk of pH susceptibility, enzymatic  
131 degradation, rapid gut transit, and low permeability across the intestinal epithelium [24–27].  
132 To surmount these limitations, in the present study, we chose to use chitosan (CS) as a  
133 protective shield owing to the large surface area, excellent mucoadhesive property,  
134 biodegradability, low immunogenicity with enhanced ability to adsorb on Microfold cells (M-  
135 cells) [28–38].

136 In this study, we demonstrated that mice mucosally administered with CS coated OMVs (CS-  
137 OMVs) induced a high titre of systemic (IgG) and local (sIgA) antibodies. The neutralizing  
138 ability of the sIgA produced in the intestine was confirmed by *in vitro* inhibition of cell  
139 adherence and invasion of *C. jejuni* while *in vivo* challenge study in immunized mice showed  
140 a significant reduction in cecal load of *C. jejuni*. Further, to investigate the immunological  
141 correlates of the observed protection, present data suggest OMVs driven T cell proliferation  
142 with increased CD4<sup>+</sup> and CD8<sup>+</sup> T cells population. In addition to antibody isotype profile,  
143 transcriptional upregulation of IFN- $\gamma$  and IL-6 genes in mesenteric lymph nodes collected from  
144 immunized mice further indicates that mucosal administration of OMVs could promote  
145 balanced type Th1/Th2 immune responses.

146 Collectively, data presented herein suggest that with convenience and ease of processing,  
147 naturally secreted OMVs may constitute a promising platform towards developing an effective  
148 acellular mucosal vaccine against *C. jejuni* for humans.

149

150

151 **Results**

152 **Spherical morphology of naturally secreted OMVs of *C. jejuni***

153 Electron microscopic analysis of OMVs released from *C. jejuni* suggests spherical morphology  
154 of the vesicles with an approximate diameter of ~110 nm (SEM) and ~130 nm (TEM). The  
155 absence of bacterial debris in micrographs confirmed the purity of OMVs fractions (Fig 2A  
156 and 2B). In terms of total protein content, it was estimated to be 100 µg in 200 mL of a fresh  
157 culture of *C. jejuni*.

158 **Biophysical characterizations of OMVs suggest a change in size and net surface charge**  
159 **with enhanced *in vitro* stability when coated with CS**

160 The mean hydrodynamic diameter of OMVs and CS-OMVs was measured to be ~150 nm and  
161 ~220 nm, respectively. In addition, CS coating of OMVs reduced the net surface charges from  
162 -23.4 mV to -8.2 mV and enhanced the *in vitro* stability in terms of size distribution,  
163 uniformity, and PDI index at different physiological conditions (S1 Fig, Table S1). Similar  
164 observations with respect to the overall size of CS-OMVs were recorded by FESEM and TEM  
165 analysis, which were ~157 nm and ~165 nm, respectively (Fig 2A and 2B, Table 2).

166 **Table 2.** Biophysical characteristics of OMVs and CS-OMVs by DLS, SEM, and TEM  
167 analysis.

| Types   | Average size (nm) |     |     | Zeta Potential (ζ)<br>(mV) |
|---------|-------------------|-----|-----|----------------------------|
|         | DLS               | SEM | TEM |                            |
| OMVs    | 149.9             | 110 | 130 | -23.4                      |
| CS-OMVs | 221.9             | 157 | 165 | -8.2                       |

168

169 **Co-incubation of *C. jejuni* with OMVs enhanced bacterial invasion of host cells**

170 To determine whether the interaction of OMVs with target cells have an influence on the  
171 invasion ability of *C. jejuni*, gentamicin protection assay was performed. Human INT407 cells  
172 infected with *C. jejuni* in the presence of exogenous OMVs showed an enhanced capacity of  
173 *C. jejuni* invasion in a dose-dependent manner (5 µg/mL, 10 µg/mL, 20 µg/mL) (*C. jejuni* +  
174 OMVs Vs *C. jejuni* only,  $P \leq 0.01$ ) (Fig 1).

### 175 **Mucosal administration of CS coated OMVs induced strong local (sIgA) immune** 176 **responses in mice**

177 To assess the mucosal immune responses imparted by OMVs administration in mice, faecal  
178 pellets and intestinal lavages were collected at day 7 post last immunization and processed by  
179 indirect ELISA. The comparative analysis of mean antibody titre of local sIgA present in faecal  
180 soup and lavages indicates a substantial increase in sIgA titre in mice that received either CS-  
181 OMVs or IFA-OMVs compared to the control mice (received PBS only) ( $P \leq 0.01$ ) (Fig 3B  
182 and 3C).

### 183 **CS-OMVs mediated induction of mixed type Th1/Th2 immune responses in mice**

184 Systemic antibody responses in the sera of immunized mice were further examined by  
185 assessing the presence of OMVs specific serum IgG level as well as different subclasses (IgG1,  
186 IgG2a, and IgG2b) by indirect ELISA. With respect to total IgG responses, animals that  
187 received either CS-OMVs or IFA-OMVs showed a significant rise in antibody titre at day 7  
188 post last immunization ( $P \leq 0.01$ ). Critical analysis of IgG subclasses suggests substantial  
189 increment in IgG1, IgG2a, and IgG2b in the sera of CS-OMVs immunized mice followed by  
190 IFA-OMVs injected mice ( $P \leq 0.01$ ) (Fig 3D).

### 191 **OMVs driven cellular immune responses in immunized mice**

192 To determine the mucosal delivery of OMVs in inducing specific cellular responses, *in vitro*  
193 splenocyte proliferation assay was performed at day 7 post last immunization. Significant



194 increase in cell proliferation rate as revealed by higher stimulation index in mice that received  
195 either CS-OMVs (S.I=4.6) or IFA-OMVs (S.I=4.8) ( $P \leq 0.01$ ) indicate effective priming of T  
196 cells by OMVs. In contrast, no detectable response was found in the case of control groups  
197 (PBS or CS administered mice) (Fig 4A).

#### 198 **CS-OMVs immunization triggers NO production *in vitro***

199 Splenocytes harvested from experimental mice in response to *in vitro* stimulation with varying  
200 concentrations of purified OMVs results in high-level production of NO in the culture  
201 supernatants of cells collected from both CS-OMVs and IFA-OMVs immunized mice  
202 (Immunized Vs Control) ( $P \leq 0.01$ ). A critical analysis suggests a concentration-dependent (0.1  
203  $\mu\text{g/mL}$ , 0.5  $\mu\text{g/mL}$ , 1  $\mu\text{g/mL}$ ) increase in NO production in response to *in vitro* stimulation with  
204 OMVs in immunized mice (Fig 4B).

#### 205 **Immunophenotyping of OMVs specific T cell subsets (CD3<sup>+</sup>, CD4<sup>+</sup>, CD8<sup>+</sup>, and CD196<sup>+</sup> T 206 cells) in immunized mice**

207 Immunophenotyping of T cell subsets (Th, Tc, and Th17 cells) in mice spleen collected from  
208 different experimental groups by flow cytometric analysis indicates a marked increase in total  
209 CD3<sup>+</sup> T cells population in CS-OMVs (~32 %) and IFA-OMVs (~34 %) administered mice  
210 as compared to control animals (PBS: ~22 %; CS: ~25 %) ( $P \leq 0.01$ ) (Fig 5A, Table 3). With  
211 respect to Th and Tc cells, a significant rise in both CD4<sup>+</sup> T ( $P \leq 0.05$ ) and CD8<sup>+</sup> T ( $P \leq 0.01$ )  
212 subset population was noted in the CS-OMVs group followed by IFA-OMVs immunized group  
213 (Immunized Vs Control). In contrast, a specific increase in CD196<sup>+</sup> T cells population in IFA-  
214 OMVs immunized group was noted ( $P \leq 0.01$ ), while only a marginal rise was found in mice  
215 that received mucosal administration of CS-OMVs (Fig 5B, Table 3).

216

217 **Table 3.** Mean percentage of total T cells and other subsets population (Th, Tc, and Th17)  
218 among different experimental groups.

| Experimental groups | Live cell percentage $\pm$ SE |                              |                              |                                   |
|---------------------|-------------------------------|------------------------------|------------------------------|-----------------------------------|
|                     | T cells (CD3 <sup>+</sup> )   | Th cells (CD4 <sup>+</sup> ) | Tc cells (CD8 <sup>+</sup> ) | Th 17 cells (CD196 <sup>+</sup> ) |
| PBS                 | 22.94 $\pm$ 0.35              | 16.95 $\pm$ 0.14             | 5.81 $\pm$ 0.14              | 3.72 $\pm$ 0.21                   |
| CS                  | 25.70 $\pm$ 1.16              | 18.23 $\pm$ 0.53             | 7.04 $\pm$ 0.13**            | 2.84 $\pm$ 0.27                   |
| CS-OMVs             | 32.66 $\pm$ 1.07**            | 20.85 $\pm$ 1.33*            | 7.26 $\pm$ 0.24**            | 5.46 $\pm$ 0.98                   |
| IFA-OMVs            | 34.30 $\pm$ 0.60**            | 19.99 $\pm$ 0.67*            | 7.12 $\pm$ 0.42*             | 8.91 $\pm$ 1.76**                 |

219 \* $P \leq 0.05$ ; \*\* $P \leq 0.01$  with respect to PBS group of respective T cells subsets presented in each  
220 column.

### 221 **CS-OMVs immunization mediates pro-inflammatory cytokine responses in mice**

222 Comparative analysis of mean fold changes of cytokine gene expression suggests  
223 transcriptional upregulation of IL-6 ( $P \leq 0.05$ ) and IFN- $\gamma$  ( $P \leq 0.01$ ) genes in mice mucosally  
224 administered with CS-OMVs followed by IFA-OMVs injected mice (Immunized Vs Control).  
225 However, no changes were observed in IL-4 gene expression. Additionally, to see the effect of  
226 OMVs immunization of mice in modulating the innate immune response, TLR 4 gene was  
227 chosen; however, only minor changes were noted (Fig 6).

### 228 **Mucosal administration of CS-OMVs reduced cecal load of *C. jejuni* in challenged mice**

229 To assess the protective efficacy of mucosal delivery of chitosan-coated OMVs, mice of  
230 different experimental groups were challenged with *C. jejuni*, and the bacterial load was  
231 determined in cecum at day 7 post-challenge. Although the data shows a similar trend with  
232 respect to total bacterial load (CFU/gm), we noted some variations between similar treatment  
233 groups within experimental repeats; hence, normalized data were used for comparative analysis  
234 (S3A Fig, Table S2). Critical analysis of combined and normalized data suggests a significant  
235 reduction in cecal load of *C. jejuni* in mice specifically immunized with CS-OMVs (~2 fold)

236 followed by IFA-OMVs (~1.9 fold) injected mice (Immunized Vs Control) ( $P \leq 0.01$ ) (Fig  
237 7A).

### 238 **Mucosal administration of CS-OMVs prevents cecal pathology in challenged mice**

239 The cecal tissues of challenged mice immunized with CS-OMVs or IFA-OMVs, except for  
240 some minor changes, no noticeable pathology was detected (Fig 7B). In contrast, unimmunized  
241 mice (PBS or CS group) challenged with *C. jejuni* showed marked inflammatory changes in  
242 cecal tissue, including lymphoid depletion, necrosis and degenerative changes mainly in the  
243 Peyer's patches. Some desquamation of the villi with characteristics focal enterocytosis related  
244 pseudo-stratification was also clearly visible (Fig7B). Additionally, focal edema in sub-  
245 muscularis mucosae with some mononuclear and polynuclear cell infiltration was observed in  
246 unimmunized mice. Moreover, focal changes in terms of hyperplasia of goblet cells along with  
247 the accumulation of mucins and vacuolar degeneration in the cytoplasm of cells of the crypt,  
248 cryptal deformation were evident in mice that received CS only. Notably, diffuse plasma cell  
249 infiltration along the periphery of the crypt and accumulation of the proteinaceous material in  
250 the cells of the crypt was distinctly found in the tissue sections of immunized mice that received  
251 either CS-OMVs or IFA-OMVs (Fig7B).

### 252 ***In vitro* neutralization of *C. jejuni* by OMVs specific local (sIgA) antibody**

253 Neutralization of *C. jejuni* with faecal soup (undiluted) collected from mice mucosally  
254 administered with CS-OMVs showed a significant reduction in the total number of associated  
255 bacteria (adhered + invaded) recovered from infected INT407 cells followed by IFA-OMVs  
256 immunized group ( $P \leq 0.01$ ) (Fig 7C, S3B Fig, Table S3).

### 257 **Discussion**

258 Harmonized secretion of major virulence factors is a shared mechanism by many mucosal  
259 pathogens, including *C. jejuni*. However, except T6SS, *C. jejuni* lacks many classical

260 virulence-associated secretion and export systems in comparison to the other enteric pathogens  
261 [10]. As an alternative means, *C. jejuni* employs OMVs as a concerted strategy to deliver active  
262 toxins and secretory proteins into the target cells [9]. With the ability to shuttle molecules  
263 between cells, OMVs are known to facilitate cell-to-cell communication and perhaps helps  
264 bacteria to limit their elimination during gut transit. With these unique functional diversities  
265 exhibited by OMVs, results of our *in vitro* invasion study suggest the possible involvement of  
266 naturally secreted OMVs in the enhancement of *C. jejuni* invasion of host cells in a dose-  
267 dependent manner and subsequent pathogenesis in a way similar to other enteric pathogens  
268 [39,40]. The ability of cell invasion by *C. jejuni* is likely to be facilitated by the presence of  
269 OMVs associated several serine proteases including high-temperature requirement protein  
270 (HtrA), Cj0511 as well as Cj1365c proteins, which are known to cleave E-cadherin adherence  
271 junction without affecting the fibronectin receptor of polarized as well as non-polarized cells  
272 lines including human IINT407 cells [12,41–43].

273 Given the significance of this system in overall defense, bacterial pathogenicity, and their  
274 ability to manipulate both B and T cell responses, the use of bacterial OMVs as possible tools  
275 for diverse biotechnological applications, including vaccine development against typical  
276 intracellular bacteria has raised significant attention in the recent times [44–52]. Because *C.*  
277 *jejuni* primarily adhere to intestinal epithelial cells, an upshot of vaccination against *C. jejuni*  
278 largely relies on the significant induction of local immune responses [24]. To this end, we  
279 described here a systematic approach to establish the value of CS coating over OMVs for  
280 promoting OMVs mediated *in vivo* immune-protection against *C. jejuni* challenge in the murine  
281 model [28–38].

282 The advantage of CS as naturally available mucoadhesive polymers for mucosal vaccine  
283 delivery platform has been conceptualized by several studies in the past [53]. Specifically, our  
284 group has recently demonstrated a comprehensive mucosal immunization modality using CS

285 encapsulated haemolysin co-regulated protein (hcp) of T6SS in blocking cecal colonization of  
286 *C. jejuni* in chickens [54].

287 The outer membrane vesicles used in this study was isolated from a highly pathogenic *C. jejuni*  
288 (maintained in our lab) harbouring several genes encoding virulence factors (GEVFs),  
289 including *hcp* gene of *C. jejuni* T6SS. Since improper use of chemicals is often associated with  
290 the loss of lipoproteins and polysaccharides content, we purified OMVs without chemical  
291 treatment and confirmed their structural and morphological integrity [10,11,55,56]. As a  
292 polycationic polymer, CS is expected to form a positive coating around the negatively charged  
293 OMVs by electrostatic interaction which could be clearly evident from DLS data presented  
294 herein (Table 2) [57]. Expectedly, our biophysical analysis of CS coated OMVs suggest a  
295 marked increment in the mean hydrodynamic diameter of OMVs (149.9 to 221.9 nm) along  
296 with a significant drop in net negative charges (-23.4 to -8.2 mV). The negative charges of  
297 OMVs are primarily attributed to the LPS content of OMVs [15,58]. With our DLS data,  
298 additional verification of morphological features by SEM and TEM for both OMVs and CS-  
299 OMVs further substantiated the spherical nature of OMVs used in this study [15,40]. Taking  
300 into account the risk of premature degradation and intra-gastric instability of OMVs in the  
301 harsh gut environment, in addition to effective adsorption of local antigen-presenting cells  
302 (APCs), CS coating is expected to protect the OMVs from pH variability and enzymatic  
303 degradation. In fact, data presented here with respect to morphology and sizes support the  
304 enhanced stability of CS-OMVs over un-coated OMVs at various physiological conditions  
305 (Table S1) [59].

306 Since the LPS content of OMVs remains as one of the major concerns for OMVs based vaccine  
307 delivery platform, prior to *in vivo* study, we tested the cytotoxicity of OMVs in human INT407  
308 cells and confirmed the non-toxic nature with the higher safety profile for OMVs ( $CT_{50} > 100$   
309  $\mu\text{g/mL}$ ) (S2 Fig). Additionally, since no live bacteria were present during isolation and

310 purification of OMVs from culture supernatant, OMVs based vaccine platform is expected to  
311 be safe.

312 Considering the non-invasive nature, simplicity of administration, and the importance of local  
313 immune responses against *C. jejuni*, we preferentially used the mucosal route for the present  
314 study. Significant increment of local (sIgA) and systemic (IgG) antibody responses in the  
315 intestines and serum collected from OMVs immunized mice either mucosally or systemically  
316 confirmed the *in vivo* immunogenicity of OMVs. High-level sIgA expression in the intestine  
317 could be credited to the successful interaction of CS-OMVs with the locally available APCs  
318 due to strong mucoadhesive property and high density of positive charge of CS [60].

319 As a non-complement fixing antibody isotype, the neutralizing ability of sIgA is in part,  
320 exhibited by binding of bacterial epitopes with glycans, generally associated with the secretory  
321 chain and constant region of  $\alpha$  chain of sIgA, which in turn prevent bacterial adhesion to  
322 epithelial cells. A considerably low number of *C. jejuni* recovered from the cells incubated  
323 with antibody-treated bacteria strongly endorse the functionality of sIgA induced by oral  
324 administration of CS-OMVs. Hence, the neutralizing ability of local antibody against *C. jejuni*  
325 could be beneficial in terms of protecting intrinsically delicate monolayer of intestinal  
326 epithelial cells from inflammatory damage caused by *C. jejuni* adherence and invasion [61–  
327 69]. Considering that CD4<sup>+</sup> T cells primarily mediate the help to local B cells in generating  
328 neutralizing antibodies, *in vitro* blocking of *C. jejuni* adherence to host cells has led us to  
329 explore the correlates of the type of immune responses elicited by mucosal administration of  
330 OMVs [70,71].

331 The consistent and steady rise of IgG in the serum with balanced antibody isotypic profiles in  
332 mice mucosally administered with OMVs indicate mixed Th1/Th2 type responses, which could  
333 possibly be due to the intrinsic property of the proteins associated with OMVs as well as the  
334 adjuvant effect of CS [72–74]. However, it is not clear how mucosal administration of OMVs

335 affects the systemic antibody responses; one possible reason could be systemic migration of  
336 antigen primed local B cells present in the gut-associated lymphoid tissue (GALT) via  
337 lymphatic circulation [14,75–77]. Since pathogen-specific expansion and contraction of  
338 immune cells are the hallmarks of the effective activation of the immune system [78,79], we  
339 evaluated the priming effects of OMVs immunization by systematic analysis of cell  
340 proliferation, ability to produce nitric oxide (NO), expression of cytokine genes, and finally  
341 immunophenotypic profile of T cells [19,44,80–82].

342 The data obtained from *in vitro* incorporation of 5-bromodeoxyuridine (BrdU) into nucleic  
343 acids of proliferating splenocytes measured the rate of spleen cell proliferation [83]. The  
344 marked increase in lymphocyte proliferation with the present immunization regime (three  
345 doses) suggests T cells are effectively primed *in vivo* by oral immunization as immunological  
346 memory might have been induced within the specific subtypes of T cells [84,85]. The priming  
347 effect of OMVs was further substantiated by a dose-dependent increase in NO production in  
348 the culture supernatant of splenocytes treated with OMVs [86–89].

349 In parallel to these generic observations, our immunophenotyping data of T cell population  
350 within splenocytes showed a significant increase in total T cells (CD3<sup>+</sup>) [CS-OMVs: ~32 %],  
351 Th (CD4<sup>+</sup>) [CS-OMVs: ~21 %], Tc (CD8<sup>+</sup>) [CS-OMVs: ~7 %], with minor increase in Th17  
352 (CD196<sup>+</sup>) [CS-OMVs: ~5%] subsets compared to control group (received PBS only).  
353 However, the elevation in the T cell population was in comparable range of a systemically  
354 administered group of mice. Activation of these cells following priming with OMVs is a clear  
355 indication of effective processing and presentation of protein antigens associated with OMVs  
356 when administered either locally or through a systemic route [90]. Given that CD4<sup>+</sup> Th cells  
357 play a crucial role in vaccine-induced immunity, we submit that mucosal delivery of CS coated  
358 OMVs could facilitate differentiation of the naïve T cells into distinct functional subsets,  
359 including Th1. Moreover, considering the role of Th17 responses in immune-protection against

360 several enteric pathogens, including *C. jejuni*, a modest increase in the population of Th17  
361 subsets shows an additional advantage of OMVs immunization [91–94]. Together, immune  
362 phenotypic profiles of each T cell subset seem to be prudently tailored by the present  
363 immunization modality in regulating pathogen-specific immune responses [95,96].  
364 Nevertheless, with the fact that once antigen has been cleared, memory T cells become the sole  
365 source for subsequent immune surveillance both locally and systemically, further study with a  
366 longer post-immunization timeline is required [97].

367 Critical analysis of the antibody isotype data obtained from mucosally administered mice while  
368 suggesting skewing of the Th cell differentiation towards mixed Th1/Th2 type responses, the  
369 transcriptional upregulation of IFN- $\gamma$ , and IL-6 genes also supports the protective Th1 type  
370 response [98–100]. Intriguingly, we noted relatively low-level expression of IL-4 as Th2-  
371 inducing cytokines produced by the T cells. In spite of strong IL-6 expression, as a potent  
372 regulator for differentiation of naive CD4<sup>+</sup> T cells to the Th2 phenotype, low-level expression  
373 of the IL-4 indicates that the IL-6 may trigger the Th2 pathway by inducing a small amount of  
374 endogenous IL-4. This could be presumably due to the autocrine differentiation factor for the  
375 Th 2 cells [101].

376 Considering that the LPS (or LOS) is the most abundant pathogen-associated molecular  
377 patterns (PAMPs) associated with OMVs [90], we next studied whether OMVs immunization  
378 has any role in TLR gene activation. However, only a minor increase in the TLR 4 gene  
379 expression was noted; this could be presumably due to less amount of LOS present in the  
380 OMVs. Nevertheless, purification methods, the time point for isolating OMVs, and differences  
381 among *C. jejuni* strain with respect to LOS content could be other determining factors for the  
382 final LOS content of OMVs used in this study [102,103].

383 Our final aim was embodied to see the effect of cellular and local immune responses towards  
384 immune-protection following challenge with highly pathogenic *C. jejuni*. The observed



385 reduction in the cecal load of *C. jejuni* in mice belonging to either mucosally (~2 fold) or  
386 systemically immunized (~1.9 fold) groups was found to be significant compared to the  
387 controls. Further, a strong correlation between cecal load of *C. jejuni* with the degree of  
388 pathology in cecal tissue of immunized and unimmunized mice was observed, which suggests  
389 the ability of OMVs immunization in protecting delicate intestinal epithelium lining against *C.*  
390 *jejuni* invasion. Intriguingly, the infiltration of OMVs specific plasma cells in the intestinal  
391 follicles in immunized mice could be due to effective affinity maturation and class switching  
392 of antibody-producing B cells to IgA-secreting plasma cells [104–107].

393 Although no detectable difference in the magnitude of overall immune responses was observed  
394 in terms of route of administration of OMVs, considering the non-invasive nature, simplicity  
395 of administration with broad coverage of local and systemic immune responses, our approach  
396 of mucosal delivery of OMVs could be a safer alternative to the systemic mode of  
397 immunization. Notwithstanding that there are many factors that can influence the response to  
398 mucosal vaccination, the studies reported herein provide relevant insight of using chitosan to  
399 modulate OMVs specific immune-protection towards controlling the risk of systemic  
400 dissemination of *C. jejuni*.

## 401 **Materials and Methods**

### 402 **Bacterial strains, culture conditions, cell lines, and other reagents**

403 *C. jejuni* (18aM) was isolated from the cecal content of commercial broiler chickens and  
404 processed as per the procedure described elsewhere [54]. Briefly, samples were serially diluted  
405 in autoclaved distilled water and 0.1 mL from 10<sup>-3</sup> dilution was plated onto Blood Free  
406 Campylobacter Selectivity Agar Base media (HiMedia, India) having CAT Selective  
407 Supplement (cefoperazone 8 mg/L, amphotericin 10 mg/L, and teicoplanin 4 mg/L) (HiMedia)  
408 followed by incubation for 48 h. Colonies found positive for *C. jejuni* were next grown in

409 Mueller Hinton broth (HiMedia) supplemented with CAT supplement for 48 h under  
410 microaerophilic condition (10 % CO<sub>2</sub>, 5 % O<sub>2</sub>, and 85 % N<sub>2</sub>) at 42 °C using microaerophilic  
411 generating gas pack (Anaerogas pack 3.5 L, HiMedia)

412 All chemical substances and reagents used in this study were of analytical grade. Chitosan (CS)  
413 and Sodium Tripolyphosphate (TPP) were obtained from HiMedia and Loba Chemie (India),  
414 respectively. Bicinchoninic acid (BCA) protein assay kit was purchased from Pierce Chemical  
415 Co. (USA). Incomplete Freund's adjuvant and Histopaque 1077 were procured from Sigma  
416 (USA). Goat anti-mouse IgG (H+L; HRP) was purchased from Life Technologies (USA). HRP  
417 conjugated goat anti-mouse IgG1, IgG2a, IgG2b, and IgA antibodies were obtained from  
418 Bethyl Laboratories (USA). The FITC, APC, PE, eFlour 660 conjugated anti-mouse CD3,  
419 CD4, CD8a, and CD196, respectively, were obtained from eBioscience, Invitrogen (USA).  
420 Enzyme substrate 3, 3',5, 5'-tetramethyl benzidine (TMB) was purchased from HiMedia. The  
421 human non-polarized INT407 cell line was procured from National Centre for Cell Science,  
422 Pune (India), and maintained in our laboratory following standard protocol. Primers used in  
423 the present study were purchased from IDT technologies (USA).

#### 424 **Isolation and purification of OMVs derived from *C. jejuni* isolate**

425 The vesicles were isolated from the culture supernatant of 18aM *C. jejuni* isolate following the  
426 method as described earlier with some modifications [108]. Briefly, cultures were grown for  
427 14 h under the microaerophilic condition at 42 °C followed by centrifugation at 10,000 x g for  
428 15 min at 4 °C. The supernatant was filtered through a 0.45 µm pore size membrane (Millipore)  
429 to remove the remaining bacterial cells. Approximately 0.1 mL of the filtrate was plated onto  
430 Mueller Hinton (MH) agar plate to test the presence of viable *C. jejuni* cells. In all cases,  
431 colonies were not observed. Vesicles recovered by ultracentrifugation of filtered supernatant  
432 at 150,000 x g for 2 h at 4 °C using a Ti 45 rotor (Beckman Instruments, USA), were washed

433 with phosphate-buffered saline (PBS) and resuspended in PBS and stored at -20°C. The protein  
434 concentration of isolated OMVs was determined using the bicinchoninic acid (BCA) method.

### 435 **Role of OMVs in *C. jejuni* invasion of human INT407 cells**

436 To assess the role of OMVs in *C. jejuni* invasion of the host cell, a gentamicin protection assay  
437 was performed according to the procedure mentioned previously in our lab [109]. Briefly,  
438 INT407 cells were seeded at a density of  $3 \times 10^5$  cells/well in a 24-well cell culture plate. A  
439 confluent monolayer of cells was treated with different concentration of OMVs (5 µg/mL, 10  
440 µg/mL, 20 µg/mL) followed by co-incubation with *C. jejuni* (18aM isolate) at Multiplicity of  
441 Infection (MOI) 1:100 for 3 h at 37 °C and 5 % CO<sub>2</sub> pressure. Post 3 h, the media was aspirated,  
442 followed by washing with PBS. For gentamicin protection assay, cells were treated with 150  
443 µg/mL of gentamicin (prepared in 1X PBS) to kill the extracellular adhered bacteria and  
444 incubated for another 2 h at 37 °C under 5 % CO<sub>2</sub> pressure. After incubation, *C. jejuni* infected  
445 monolayers were washed with PBS and lysed with 1 % Triton X-100 (prepared in PBS). The  
446 recovered bacteria were serially diluted in MH broth and plated onto MH agar plate followed  
447 by incubation at 42 °C for 24 h under the microaerophilic conditions in a tri-gas incubator  
448 (Thermo Scientific). Bacterial colonies that appeared on the plate were counted to enumerate  
449 colony-forming units (CFU). The assay was performed in triplicate and regression value was  
450 calculated using non-linear regression in GraphPad Prism software. Data represent Mean  
451 CFU/mL ± SE of two independent experiments.

### 452 **Immunogen preparation**

#### 453 **Preparation of chitosan-coated OMVs for mucosal delivery**

454 For mucosal delivery, chitosan was cross-linked with sodium tripolyphosphate (CS-TPP)  
455 following the protocol described previously in our lab with some modifications [54]. Briefly,  
456 700 µL of freshly isolated OMVs (~70µg) was mixed with 3.3 mL of CS solution (0.05 % w/v)

457 followed by drop-wise addition of 1 mL of TPP solution (0.1% w/v). The mixture was stirred  
458 for 2 h at 4 °C. The slurry formed was centrifuged at 14,000 x g for 30 min and resuspended in  
459 0.2 mL of sterile PBS (pH 7.4).

## 460 **Biophysical characterization of CS coated OMVs**

### 461 **Dynamic light scattering (DLS) and measurement of zeta potential ( $\zeta$ )**

462 The size distribution and overall surface charge (zeta potential;  $\zeta$ ) of OMVs and CS coated  
463 OMVs were measured as described elsewhere with minor changes [110,111]. Concisely,  
464 OMVs alone and CS coated OMVs were diluted (1:100 dilution) in PBS for size and milliQ  
465 water for charge analysis followed by sonication for 15 min. After sonication, samples were  
466 analyzed for size distribution by DLS and zeta potential by laser doppler micro-electrophoresis  
467 using Malvern Zetasizer Nano ZS instrument (USA). In addition, to confirm the stability of  
468 NPs coated OMVs, size distribution analysis was performed at varying pH, buffer  
469 compositions, and incubation time points (details of the experiment are mentioned in Table  
470 S1).

### 471 **Scanning electron microscopy (SEM)**

472 The morphology of the isolated OMVs and CS-OMVs were examined through SEM image  
473 analysis (Carl Zeiss SUPRA 55 V P FESEM). Samples were processed according to the method  
474 mentioned previously with some modifications [112]. Briefly, for OMVs, specimens were  
475 fixed overnight in 2.5 % (v/v) glutaraldehyde (prepared in PBS; pH 7.4) at room temperature  
476 (RT). Fixed samples were washed thrice with PBS for 10 min each followed by sequential  
477 dehydration in 35 %, 50 %, 70 %, 95 % ethanol for 10 min each and 100 % ethanol for 1 h for  
478 complete dehydration. Finally, fixed and dehydrated samples were vacuum-dried overnight.  
479 For CS-OMVs, NPs were first dispersed in milliQ water (1:100 dilution) and sonicated for 15  
480 min in a bath sonicator (Thermo Fisher Scientific, USA). Dispersed samples were further

481 processed following the procedure as mentioned above for OMVs. Samples were thoroughly  
482 dried under vacuum and fixed to aluminum stubs with silver conductive paint and sputter-  
483 coated with gold and examined using a Supra 55 Carl Zeiss scanning electron microscope.  
484 Images were analyzed using ImageJ software.

#### 485 **Transmission electron microscopy (TEM)**

486 For the TEM analysis, OMVs and CS-OMVs samples were diluted in milliQ water (1:100  
487 dilution) followed by sonication for 30 min at RT. After 30 min, ~ 5  $\mu$ L of the sonicated  
488 samples were drop cast onto 300-mesh formvar carbon-coated copper grids (Electron  
489 Microscopy Sciences, UK) and negatively stained with UranylLess (Electron Microscopy  
490 Sciences). Samples were left undisturbed for 10 min followed by removal of excess fluid using  
491 filter paper. The samples were vacuum-dried overnight. Data acquisition was made using a  
492 JEOL JEM-2100 Plus LaB6 series electron microscope (Japan) operating at an accelerating  
493 voltage of 120 kV. Images were analyzed using ImageJ software.

#### 494 **Assessing the immune-protective potential of OMVs in mice**

##### 495 **Immunization and challenge schedule**

496 Female BALB/c mice were purchased from the National Centre for Laboratory Animal  
497 Sciences, National Institute of Nutrition, Hyderabad, India. Six-week-old mice ( $20\pm 1$  g) were  
498 separated into randomized groups of 10 animals ( $n=10$  per group). Mice were divided into four  
499 experimental groups as follows: Group 1: PBS (Sham control); Group 2: CS (Vehicle control);  
500 Group 3: chitosan-coated OMVs (CS-OMVs); Group 4: OMVs emulsified with Incomplete  
501 Freund's adjuvant (IFA-OMVs). Mice of experimental Groups 1 to 3 were immunized orally,  
502 whereas mice belonging to Group 4 were injected through a subcutaneous route. Group 3 and  
503 4 received 20  $\mu$ g of OMVs in 100  $\mu$ L PBS for all immunizations. At day 7 post last

504 immunization half of the animals belonging to different groups were sacrificed for sample  
505 collection, whereas the remaining half were challenged with  $1 \times 10^8$  CFU/mice of *C. jejuni*.

#### 506 **Sample collection**

507 **Blood:** Approximately 80  $\mu$ L blood samples were collected from mice by retro-orbital puncture  
508 with heparinized capillaries at day 7 post last immunization. The collected blood was allowed  
509 to clot at room temperature (RT) for 2 h followed by centrifugation at  $1000 \times g$  for 15 min. The  
510 separated sera were stored at  $-20^\circ\text{C}$  until use.

511 **Faeces:** Faecal pellets were obtained from individual mice at day 7 post last immunization and  
512 resuspended in IgA extraction buffer (1X PBS pH 7.4 containing 0.05 % Tween 20, 0.5 % fetal  
513 bovine serum, 1mg/ml EDTA, and 1 mM phenylmethanesulfonyl fluoride (PMSF) as protease  
514 inhibitor). Pellets were vortexed until thoroughly macerated, and then the insoluble material  
515 was pelleted by centrifugation at  $1000 \times g$  for 20 min at  $4^\circ\text{C}$ . The clarified faecal extracts were  
516 stored at  $-20^\circ\text{C}$  until further use.

517 **Intestinal lavages:** The lavage was collected at day 7 post last immunization and processed as  
518 described previously with slight modifications [113]. Briefly, the ileocecal junction was cut off  
519 from each sacrificed mice, and the interior of the intestine was flushed with 0.2 mL PBS. After  
520 centrifugation at  $1000 \times g$  for 15 min at  $4^\circ\text{C}$ , the supernatants were collected and stored at  $-20^\circ\text{C}$   
521 until use.

522 **Tissue samples:** Spleen and mesenteric lymph node (mLN) were collected from 5 mice of each  
523 experimental group at day 7 post last immunization under sterile condition. Spleen samples  
524 were immediately processed for cell-mediated immune response study, whereas mLN were  
525 stored in RNA later (Qiagen, USA) at  $-20^\circ\text{C}$  till further use.

#### 526 **Local and systemic antibody responses in mice immunized with OMVs**

## 527 **Mucosal antibody responses (sIgA) in gastric lavages and faecal soups**

528 The production of OMVs specific secretory IgA (sIgA) antibody was measured in intestinal  
529 lavage and faecal soup of the immunized mice by indirect ELISA as mentioned elsewhere with  
530 minor changes [114]. In brief, 96-well ELISA plates (Thermo Fisher Scientific) were coated  
531 with OMVs (100 ng/well) overnight at 4 °C followed by washing with 1X PBS-T (0.05%  
532 Tween- 20 in PBS) and blocking with 3 % Bovine Serum Albumin (BSA) (prepared in PBS-  
533 T) at 37 °C for 1 h. Next, wells were washed with PBS-T and incubated with two-fold serially  
534 diluted lavage and faecal soup collected from different experimental mice (starting with 1:2  
535 dilution) for 2 h at RT followed by another 1 h incubation with HRP conjugated Goat anti-  
536 mouse IgA secondary antibody (1:3000 dilution). Following several washes, the TMB  
537 substrate was added to each well. Finally, the reaction was stopped with 50 µL of 1 M H<sub>2</sub>SO<sub>4</sub>,  
538 and the absorbance was read at 495 nm in a microplate reader (BioTek, USA). Data represent  
539 Mean of absorbance ± SE of two independent experiments.

## 540 **Systemic antibody responses in sera**

541 Serum antibody against OMVs was determined through indirect ELISA as mentioned in the  
542 above section except sera samples were two-fold serially diluted (starting from 1:20) followed  
543 by incubation with HRP conjugated Goat anti-mouse IgG, IgG1, IgG2a, and IgG2b secondary  
544 antibodies (1:3000 dilution). Subsequently, wells were treated with TMB substrate and finally,  
545 the reaction was stopped with 1 M H<sub>2</sub>SO<sub>4</sub>, and the absorbance was read at 495 nm in a  
546 microplate reader (BioTek, USA). Data represent Mean of absorbance ± SE of two independent  
547 experiments.

## 548 **Cellular immune responses in mice immunized with OMVs**

### 549 **Preparation of mononuclear cells**

550 To isolate mononuclear cells, mice from each experimental group were sacrificed, spleens were  
551 removed and lymphocyte enriched mononuclear cells were separated using Histopaque 1077  
552 as mentioned elsewhere with slight modifications [115]. Briefly, spleens were collected under  
553 aseptic condition, washed thrice with PBS, and resuspended in 1 mL complete RPMI 1640  
554 growth media (10 % fetal bovine serum and 1X penicillin-streptomycin). Next, tissue was  
555 transferred to a sterile petri-dish and crushed with a flat end of 5 mL disposable syringe. Cell  
556 suspension from the petri-dish was aspirated and filtered through a 70 µm cell strainer. The  
557 flow-through comprising single-cell suspensions was layered onto pre-warmed histopaque in  
558 a 1:1 ratio and centrifuged at 400 x g for 20 min at 23 °C. The middle cloudy whitish interface  
559 was taken off (containing mononuclear cells) and resuspended in complete RPMI growth  
560 media for further use in a splenocyte proliferation assay.

#### 561 **Splenocytes proliferation assay**

562 To determine the splenocyte proliferation of experimental animals, spleen lymphocyte  
563 proliferation assay was performed using the BrdU cell proliferation ELISA kit following the  
564 manufacturer's protocol (Abcam). Briefly, the lymphocyte-enriched mononuclear cells  
565 obtained as described in the above section were counted and seeded at a density of  $2 \times 10^5$   
566 cells/ well in triplicate in flat-bottomed 96-well cell culture plates, co-stimulated with OMVs  
567 (1 µg/mL) and incubated at 37 °C under 5 % CO<sub>2</sub> pressure. Splenocytes stimulated with  
568 mitogen Concanavalin A (ConA) (10 µg/mL), or RPMI 1640 media alone (un-stimulated) were  
569 kept as positive and negative controls respectively. Post 24 h of stimulation, 20 µL of 1X BrdU  
570 reagent (Abcam, USA) was added to each well and incubated for another 24 h. After  
571 incubation, cells were fixed and DNA was denatured using a fixing solution followed by  
572 probing with anti-BrdU monoclonal detector antibody for 1 h at RT. Next, cells were labelled  
573 with 1X HRP conjugated goat anti-mouse IgG antibody. After washing with wash buffer, the  
574 plates were developed with the TMB substrate. The reaction was stopped with stop solution



575 and absorbance was read at 450 nm using Epoch 2 microplate reader (BioTek, USA). Data are  
576 expressed as stimulation index (S.I) which is described as the ratio of the mean absorbance of  
577 stimulated cells to that of unstimulated cells. The assay was performed in triplicate and data  
578 represent Mean stimulation index  $\pm$  SE of two independent experiments.

$$\text{Stimulation Index} = \frac{\text{Mean absorbance of stimulated cells}}{\text{Mean absorbance of unstimulated cells}}$$

### 581 **Assessment of Nitric Oxide (NO) production**

582 To determine NO production in the splenocytes of experimental mice, the accumulation of  
583 nitrite was quantified using the standard Griess assay as described previously with minor  
584 modification [116]. Briefly, splenocytes were seeded at a density of  $2 \times 10^4$  cells/well in phenol  
585 red-free complete RPMI 1640 growth media in 12-well cell culture plate followed by  
586 stimulation with varying concentration of OMVs (0.1  $\mu\text{g}/\text{mL}$ , 0.5  $\mu\text{g}/\text{mL}$ , and 1.0  $\mu\text{g}/\text{mL}$ ). Cells  
587 with RPMI alone and cells stimulated with ConA (10  $\mu\text{g}/\text{mL}$ ) were kept as controls. After 48  
588 h of incubation, 100  $\mu\text{L}$  of media were incubated with an equal volume of Griess reagent (1 %  
589 sulfanilamide, 0.1 % naphthyl ethylenediamine dihydrochloride, 2.5 %  $\text{H}_3\text{PO}_4$ ) for 15 min at  
590 RT. The absorbance was measured at 570 nm in Epoch 2 microplate reader (BioTek, USA).  
591 The conversion of absorbance into micromolar concentrations of NO was deduced from a  
592 standard curve using a known concentration of  $\text{NaNO}_2$ . The assay was performed in triplicate,  
593 and data represent Mean NO concentration  $\pm$  SE of two independent experiments.

### 594 **Immunophenotyping of T cell population in immunized mice**

595 To determine the total T cell and their subsets, mononuclear cells were isolated from the spleens  
596 as mentioned previously and processed for flow cytometry as described elsewhere with minor  
597 modifications [117]. Briefly,  $1 \times 10^6$  mononuclear cells were resuspended in 0.1 mL of FACS  
598 buffer (PBS with 1 % BSA) in flow cytometry tubes. Cell surface marker staining was

599 performed by probing them with the following monoclonal antibody (mAb) combination:  
600 CD3-FITC (0.0025  $\mu\text{g}/\mu\text{L}$ ), CD4-APC (0.00125  $\mu\text{g}/\mu\text{L}$ ), CD8-PE (0.0025  $\mu\text{g}/\mu\text{L}$ ), CD196-  
601 eFluor 660 (0.0015  $\mu\text{g}/\mu\text{L}$ ) followed by 45 min incubation on ice in the dark. The proportion  
602 of T cell subsets in the spleen were specifically analyzed by selective gating based on the size  
603 and granularity of the cells using the FACSCalibur flow cytometer (BD Biosciences) and  
604 analyzed with the CellQuest Pro software. Data represent Mean cell percentage  $\pm$  SE of two  
605 independent experiments.

#### 606 **Toll-like receptor 4 (TLR-4) and cytokine genes expression**

607 The expression of cytokine genes was determined in RNA extracted from mLN tissue stored  
608 in RNA *later* as per the method described elsewhere with some modifications [118,119].  
609 Briefly, 30 mg of the mLN tissue was washed with PBS and homogenized in Trizol reagent  
610 followed by 15 min incubation at RT. Next, chloroform was added in a 1:1 ratio and mixed  
611 vigorously (without vortex) and incubated for 15 min at RT to form layers. After incubation,  
612 the samples were centrifuged at 10,000 x g for 20 min at 4  $^{\circ}\text{C}$ . The upper aqueous layer was  
613 collected in a centrifuge tube followed by the addition of 500  $\mu\text{L}$  of isopropanol, mixed and  
614 incubated at -20  $^{\circ}\text{C}$  overnight. The following day samples were centrifuged at 10,000 x g for  
615 30 min at 4  $^{\circ}\text{C}$ . The pellet obtained was washed with 70 % ethanol and air-dried. Finally, the  
616 pellet was dissolved in nuclease-free water (NFW). The concentration of RNA was determined  
617 using Epoch 2 microplate spectrophotometer (BioTek).

618 Approximately 2  $\mu\text{g}$  of RNA was used for cDNA synthesis using the Superscript Reverse  
619 Transcriptase kit following the manufacturer's protocol (BioBharati, India). Primers used to  
620 assess the expression of genes are listed in Table 1. PCR amplification was carried out in a  
621 total volume of 20  $\mu\text{L}$  master mix containing forward and reverse primers, dNTPs, Taq buffer,  
622 Taq polymerase, cDNA, and NFW. The PCR cycle consisted of initial denaturation at 94  $^{\circ}\text{C}$

623 for 3 min followed by 30 cycles of amplification at 94 °C for 1 min, 50 °C to 60 °C for 45 sec,  
624 72 °C for 2 min followed by a final extension at 72 °C for 5 min. The expression of  $\beta$ -actin as  
625 a housekeeping gene was used for normalization of the data between samples. Data are  
626 presented as the mean fold change calculated with respect to the control group (received PBS  
627 only) using Image Lab™ software (Bio-Rad, USA). Data represent Mean fold changes  $\pm$  SE  
628 of two independent experiments.

629 **Table 1.** List of the primers used in the present study.

| S. No. | Target genes   | Primer sequences (5' → 3')                                    | Amplicon size (bp) | References |
|--------|----------------|---------------------------------------------------------------|--------------------|------------|
| 1      | $\beta$ -actin | F.P TCACCCACACTGTGCCCATCTACGA<br>R.P GGATGCCACAGGATTCCATACCCA | 348                | This study |
| 2      | TLR-4          | F.P TCGCCTTCTTAGCAGAAACAC<br>R.P GCCTTAGCCTCTTCTCCTTC         | 403                | This study |
| 3      | IL-6           | F.P TAGTCCTTCCACCCCAATTTC<br>R.P TTGGTCCTTAGCCACTCCTTC        | 76                 | [120]      |
| 4      | IFN- $\gamma$  | F.P ATGAACGCTACACACTGCATC<br>R.P CCATCCTTTTGCCAGTTCCTC        | 182                | [120]      |
| 5      | IL-4           | F.P GGTCTCAACCCCCAGCTAGT<br>R.P GCCGATGATCTCTCTCAAGTGAT       | 102                | [120]      |

630 **Effect of OMVs immunization in cecal colonization of *C. jejuni***

631 One week post last immunization, mice of various experimental groups were challenged with  
632 18aM *C. jejuni* isolate ( $1 \times 10^8$  CFU/mice) in 100  $\mu$ L of PBS. At day 7 post-challenge, mice  
633 from each group were sacrificed, the cecum was removed and cecal contents were  
634 homogenized in 2 mL of PBS (pH 7.4). Serial dilution of homogenized cecal content was made  
635 in MH broth, and 0.1 mL from  $10^{-3}$  dilution was plated onto blood-free *Campylobacter*  
636 Selective Agar Base media plate having CAT supplement. All the plates were incubated at 42  
637 °C under the microaerophilic conditions for 48 h. The number of colonies that appeared on the

638 plate were expressed as normalized CFU/gm of the cecum  $\pm$  SE of three independent  
639 experiments. The formula used for the normalization (N) of data is as follows:

$$640 \quad N = \frac{\text{CFU/gm value of each mice belonging to various experimental groups}}{\text{Highest CFU/gm value within the PBS group}}$$

641

#### 642 **Histopathological analysis of cecal tissues**

643 To determine histological changes, histopathological analysis of ceca from experimental mice  
644 at day 7 post bacterial challenge was performed as per the method described elsewhere with  
645 slight modifications [121]. Briefly, the cecum was fixed in 10 % formal solution (prepared in  
646 PBS) for 48 h at RT. The portion of the fixed specimens was washed overnight under running  
647 tap water. Following washing, samples were dehydrated sequentially using 70 %, 90 %, and  
648 100 % ethanol for 1 h each for complete dehydration. Fixed and dehydrated tissue samples  
649 were next treated with clearing agents, xylene I and II, for 1 h each. Samples were further  
650 impregnated in paraffin I, paraffin II, and paraffin III each for 1 h. Finally, samples were  
651 embedded and sectioned at 4  $\mu$ m. The samples were mounted on slides and stained with  
652 hematoxylin-eosin.

#### 653 **Assessment of the neutralization effect of secretory IgA on adherence and invasion of *C.*** 654 ***jejuni* to INT407 cells**

655 To determine the immune-protective efficacy of mucosal sIgA in blocking *C. jejuni* cell  
656 adherence and invasion, *in vitro* neutralization assay was performed as per the method  
657 described elsewhere with minor modifications [122]. Briefly,  $1.5 \times 10^6$  *C. jejuni* cells (18aM  
658 isolate) were co-incubated with undiluted and 10-fold serially diluted faecal soup for 2 h at 42  
659  $^{\circ}$ C under the microaerophilic conditions in a tri-gas incubator. After incubation, human INT407  
660 cells seeded at a density of  $1.5 \times 10^4$  cells/well in a 96-well cell culture plate were incubated  
661 with treated *C. jejuni* at MOI 1:100 for 3 h in 5 % CO<sub>2</sub>. After 3 h, cells were thoroughly washed

662 with PBS and lysed with 1 % Triton X 100 (prepared in PBS). Lysed cells were serially diluted  
663 in MH broth and 0.1 mL from  $10^{-3}$  dilution were plated onto MH agar plate followed by  
664 incubation at 42 °C for 24 h under the microaerophilic conditions. Colonies observed on the  
665 plates were counted for each experimental group to calculate CFU. Data represent normalized  
666 CFU/mL  $\pm$  SE of two independent experiments.

### 667 **Statistical analysis**

668 The GraphPad Prism statistical software (Version 8) was used for graphical presentations and  
669 data analysis. The diameter of SEM and TEM images were examined using image J software.  
670 The regression ( $R^2$ ) value for invasion assay was calculated using a non-linear regression curve.  
671 Shapiro-Wilk test was performed to confirm the normal distribution. The Student *t*-test (two-  
672 tailed, unpaired) or non-parametric Mann-Whitney U test were performed to compare  
673 significance among various experimental groups. The  $*P \leq 0.05$ ,  $**P \leq 0.01$  were considered  
674 statistically significant.

### 675 **Ethics statement**

676 The mice experimentation protocol was approved by Institute Animal Ethics Committee  
677 (IAEC), Indian Institute of Science Education and Research Kolkata, and all procedures were  
678 conducted in accordance with the Committee for the Purpose of Control and Supervision of  
679 Experiments on Animals (CPCSEA) guidelines, MoEF & CC, Govt. of India. The permit  
680 number of the experimental protocols approved by the IAEC was  
681 IISERK/IAEC/AP/2020/50.

### 682 **Author contributions**

683 AS and AIM designed the experiment, performed the experiment, analyzed the data, and wrote  
684 the manuscript. AK performed the biophysical characterization of OMVs and contributed to  
685 statistical analysis. TG assisted in flow cytometry data analysis and interpretation. SM  
686 contributed in the analysis and interpretation of histopathology data.

687 **Acknowledgments**

688 The authors AS and AK thanks IISER Kolkata and UGC for providing fellowships,  
689 respectively. We acknowledge the central Electron Microscopy Facility at the IISER Kolkata  
690 for SEM and TEM images. We also thank Dr. Dipjyoti Das, Assistant Professor, Department  
691 of Biological Sciences, IISER Kolkata, for his input in the statistical analysis. We would also  
692 like to thank the Animal facility staff at the IISER Kolkata for assistance in animal  
693 experimentation.

694 **Conflicts of interest**

695 The authors declare that there is no conflict of interest regarding the publication of this article.

696 **References**

- 697 1. Keithlin J, Sargeant J, Thomas MK, Fazil A. Systematic review and meta-analysis of the  
698 proportion of Campylobacter cases that develop chronic sequelae. BMC Public Health.  
699 2014;14: 1203. doi:10.1186/1471-2458-14-1203
- 700 2. Mousavi S, Bereswill S, Heimesaat MM. Novel Clinical Campylobacter jejuni Infection  
701 Models Based on Sensitization of Mice to Lipooligosaccharide, a Major Bacterial Factor  
702 Triggering Innate Immune Responses in Human Campylobacteriosis. Microorganisms.  
703 2020;8: 482. doi:10.3390/microorganisms8040482
- 704 3. Backert S, Tegtmeyer N, Cróinín TÓ, Boehm M, Heimesaat MM. Chapter 1 - Human  
705 campylobacteriosis. In: Klein G, editor. Campylobacter. Academic Press; 2017. pp. 1–25.  
706 doi:10.1016/B978-0-12-803623-5.00001-0
- 707 4. Meunier M, Guyard-Nicodème M, Vigouroux E, Poezevara T, Beven V, Quesne S, et al.  
708 Promising new vaccine candidates against Campylobacter in broilers. PLoS One. 2017;12.  
709 doi:10.1371/journal.pone.0188472

- 710 5. Vandeputte J, Martel A, Van Rysselberghe N, Antonissen G, Verlinden M, De Zutter L, et  
711 al. In ovo vaccination of broilers against *Campylobacter jejuni* using a bacterin and subunit  
712 vaccine. *Poultry Science*. 2019;98: 5999–6004. doi:10.3382/ps/pez402
- 713 6. Luangtongkum T, Jeon B, Han J, Plummer P, Logue CM, Zhang Q. Antibiotic resistance  
714 in *Campylobacter*: emergence, transmission and persistence. *Future Microbiol*. 2009;4:  
715 189–200. doi:10.2217/17460913.4.2.189
- 716 7. Silva J, Leite D, Fernandes M, Mena C, Gibbs PA, Teixeira P. *Campylobacter* spp. as a  
717 Foodborne Pathogen: A Review. *Front Microbiol*. 2011;2. doi:10.3389/fmicb.2011.00200
- 718 8. Alaboudi AR, Malkawi IM, Osaili TM, Abu-Basha EA, Guitian J. Prevalence, antibiotic  
719 resistance and genotypes of *Campylobacter jejuni* and *Campylobacter coli* isolated from  
720 chickens in Irbid governorate, Jordan. *International Journal of Food Microbiology*.  
721 2020;327: 108656. doi:10.1016/j.ijfoodmicro.2020.108656
- 722 9. Lindmark B, Rompikuntal PK, Vaitkevicius K, Song T, Mizunoe Y, Uhlin BE, et al. Outer  
723 membrane vesicle-mediated release of cytolethal distending toxin (CDT) from  
724 *Campylobacter jejuni*. *BMC Microbiology*. 2009;9: 220. doi:10.1186/1471-2180-9-220
- 725 10. Elmi A, Watson E, Sandu P, Gundogdu O, Mills DC, Inglis NF, et al. *Campylobacter jejuni*  
726 outer membrane vesicles play an important role in bacterial interactions with human  
727 intestinal epithelial cells. *Infect Immun*. 2012;80: 4089–4098. doi:10.1128/IAI.00161-12
- 728 11. Jang K-S, Sweredoski MJ, Graham RLJ, Hess S, Clemons WM. Comprehensive proteomic  
729 profiling of outer membrane vesicles from *Campylobacter jejuni*. *Journal of Proteomics*.  
730 2014;98: 90–98. doi:10.1016/j.jprot.2013.12.014

- 731 12. Elmi A, Nasher F, Jagatia H, Gundogdu O, Bajaj-Elliott M, Wren B, et al. Campylobacter  
732 jejuni outer membrane vesicle-associated proteolytic activity promotes bacterial invasion  
733 by mediating cleavage of intestinal epithelial cell E-cadherin and occludin. Cellular  
734 Microbiology. 2016;18: 561–572. doi:10.1111/cmi.12534
- 735 13. Elmi A, Dorey A, Watson E, Jagatia H, Inglis NF, Gundogdu O, et al. The bile salt sodium  
736 taurocholate induces Campylobacter jejuni outer membrane vesicle production and  
737 increases OMV-associated proteolytic activity. Cellular Microbiology. 2018;20: e12814.  
738 doi:10.1111/cmi.12814
- 739 14. Liu Q, Li X, Zhang Y, Song Z, Li R, Ruan H, et al. Orally-administered outer-membrane  
740 vesicles from Helicobacter pylori reduce H. pylori infection via Th2-biased immune  
741 responses in mice. Pathog Dis. 2019;77. doi:10.1093/femspd/ftz050
- 742 15. Guerrero-Mandujano A, Hernández-Cortez C, Ibarra JA, Castro-Escarpulli G. The outer  
743 membrane vesicles: Secretion system type zero. Traffic. 2017;18: 425–432.  
744 doi:10.1111/tra.12488
- 745 16. Renelli M, Matias V, Lo RY, Beveridge TJ. DNA-containing membrane vesicles of  
746 Pseudomonas aeruginosa PAO1 and their genetic transformation potential. Microbiology  
747 (Reading). 2004;150: 2161–2169. doi:10.1099/mic.0.26841-0
- 748 17. Koeppen K, Hampton TH, Jarek M, Scharfe M, Gerber SA, Mielcarz DW, et al. A Novel  
749 Mechanism of Host-Pathogen Interaction through sRNA in Bacterial Outer Membrane  
750 Vesicles. PLoS Pathog. 2016;12: e1005672. doi:10.1371/journal.ppat.1005672
- 751 18. Sjöström AE, Sandblad L, Uhlin BE, Wai SN. Membrane vesicle-mediated release of  
752 bacterial RNA. Sci Rep. 2015;5: 15329. doi:10.1038/srep15329



- 753 19. Kaparakis-Liaskos M, Ferrero RL. Immune modulation by bacterial outer membrane  
754 vesicles. *Nat Rev Immunol.* 2015;15: 375–387. doi:10.1038/nri3837
- 755 20. Price NL, Goyette-Desjardins G, Nothaft H, Valguarnera E, Szymanski CM, Segura M, et  
756 al. Glycoengineered Outer Membrane Vesicles: A Novel Platform for Bacterial Vaccines.  
757 *Scientific Reports.* 2016;6: 24931. doi:10.1038/srep24931
- 758 21. Kuehn MJ, Kesty NC. Bacterial outer membrane vesicles and the host-pathogen  
759 interaction. *Genes Dev.* 2005;19: 2645–2655. doi:10.1101/gad.1299905
- 760 22. Bonnington KE, Kuehn MJ. Protein selection and export via outer membrane vesicles.  
761 *Biochim Biophys Acta.* 2014;1843: 1612–1619. doi:10.1016/j.bbamcr.2013.12.011
- 762 23. Haurat MF, Aduse-Opoku J, Rangarajan M, Dorobantu L, Gray MR, Curtis MA, et al.  
763 Selective Sorting of Cargo Proteins into Bacterial Membrane Vesicles. *J Biol Chem.*  
764 2011;286: 1269–1276. doi:10.1074/jbc.M110.185744
- 765 24. Janssen R, Krogfelt KA, Cawthraw SA, Pelt W van, Wagenaar JA, Owen RJ. Host-  
766 Pathogen Interactions in *Campylobacter* Infections: the Host Perspective. *Clinical*  
767 *Microbiology Reviews.* 2008;21: 505–518. doi:10.1128/CMR.00055-07
- 768 25. Kararli TT. Comparison of the gastrointestinal anatomy, physiology, and biochemistry of  
769 humans and commonly used laboratory animals. *Biopharm Drug Dispos.* 1995;16: 351–  
770 380. doi:10.1002/bdd.2510160502
- 771 26. Sood A, Panchagnula R. Peroral route: an opportunity for protein and peptide drug  
772 delivery. *Chem Rev.* 2001;101: 3275–3303. doi:10.1021/cr000700m
- 773 27. Ganapathy V, Gupta N, Martindale RG. Protein Digestion and Absorption. *Physiology of*  
774 *the Gastrointestinal Tract.* 2006; 1667–1692. doi:10.1016/B978-012088394-3/50068-4

- 775 28. Badhana S, Garud N, Garud A. Colon specific drug delivery of mesalamine using eudragit  
776 S100-coated chitosan microspheres for the treatment of ulcerative colitis. *International*  
777 *Current Pharmaceutical Journal*. 2013;2: 42–48. doi:10.3329/icpj.v2i3.13577
- 778 29. Lee W-J, Cha S, Shin M, Jung M, Islam MA, Cho C, et al. Efficacy of thiolated eudragit  
779 microspheres as an oral vaccine delivery system to induce mucosal immunity against  
780 enterotoxigenic *Escherichia coli* in mice. *Eur J Pharm Biopharm*. 2012;81: 43–48.  
781 doi:10.1016/j.ejpb.2012.01.010
- 782 30. Marasini N, Skwarczynski M, Toth I. Oral delivery of nanoparticle-based vaccines. *Expert*  
783 *Rev Vaccines*. 2014;13: 1361–1376. doi:10.1586/14760584.2014.936852
- 784 31. Rhee JH, Lee SE, Kim SY. Mucosal vaccine adjuvants update. *Clin Exp Vaccine Res*.  
785 2012;1: 50–63. doi:10.7774/cevr.2012.1.1.50
- 786 32. Davitt CJH, Lavelle EC. Delivery strategies to enhance oral vaccination against enteric  
787 infections. *Adv Drug Deliv Rev*. 2015;91: 52–69. doi:10.1016/j.addr.2015.03.007
- 788 33. Leder BZ. Chapter 61-combination osteoporosis therapy with parathyroid hormone. In:  
789 Bilezikian J.P., editor. *The Parathyroids*. 3rd ed. Academic Press; San Diego, CA, USA;  
790 2015. pp. 853–863.
- 791 34. Irvine DJ, Hanson MC, Rakhra K, Tokatlian T. Synthetic Nanoparticles for Vaccines and  
792 Immunotherapy. *Chem Rev*. 2015;115: 11109–11146. doi:10.1021/acs.chemrev.5b00109
- 793 35. Jiang T, Singh B, Li H-S, Kim Y-K, Kang S-K, Nah J-W, et al. Targeted oral delivery of  
794 BmpB vaccine using porous PLGA microparticles coated with M cell homing peptide-  
795 coupled chitosan. *Biomaterials*. 2014;35: 2365–2373.  
796 doi:10.1016/j.biomaterials.2013.11.073

- 797 36. Barhate G, Gautam M, Gairola S, Jadhav S, Pokharkar V. Enhanced mucosal immune  
798 responses against tetanus toxoid using novel delivery system comprised of chitosan-  
799 functionalized gold nanoparticles and botanical adjuvant: characterization,  
800 immunogenicity, and stability assessment. *J Pharm Sci.* 2014;103: 3448–3456.  
801 doi:10.1002/jps.24161
- 802 37. Ye T, Yue Y, Fan X, Dong C, Xu W, Xiong S. M cell-targeting strategy facilitates mucosal  
803 immune response and enhances protection against CVB3-induced viral myocarditis  
804 elicited by chitosan-DNA vaccine. *Vaccine.* 2014;32: 4457–4465.  
805 doi:10.1016/j.vaccine.2014.06.050
- 806 38. Biswas S, Chattopadhyay M, Sen KK, Saha MK. Development and characterization of  
807 alginate coated low molecular weight chitosan nanoparticles as new carriers for oral  
808 vaccine delivery in mice. *Carbohydr Polym.* 2015;121: 403–410.  
809 doi:10.1016/j.carbpol.2014.12.044
- 810 39. Pollak CN, Delpino MV, Fossati CA, Baldi PC. Outer Membrane Vesicles from *Brucella*  
811 *abortus* Promote Bacterial Internalization by Human Monocytes and Modulate Their Innate  
812 Immune Response. *PLOS ONE.* 2012;7: e50214. doi:10.1371/journal.pone.0050214
- 813 40. Jan AT. Outer Membrane Vesicles (OMVs) of Gram-negative Bacteria: A Perspective  
814 Update. *Front Microbiol.* 2017;8. doi:10.3389/fmicb.2017.01053
- 815 41. Hoy B, Geppert T, Boehm M, Reisen F, Plattner P, Gadermaier G, et al. Distinct roles of  
816 secreted HtrA proteases from gram-negative pathogens in cleaving the junctional protein  
817 and tumor suppressor E-cadherin. *J Biol Chem.* 2012;287: 10115–10120.  
818 doi:10.1074/jbc.C111.333419

- 819 42. Gundogdu O, Bentley SD, Holden MT, Parkhill J, Dorrell N, Wren BW. Re-annotation  
820 and re-analysis of the *Campylobacter jejuni* NCTC11168 genome sequence. *BMC*  
821 *Genomics*. 2007;8: 162. doi:10.1186/1471-2164-8-162
- 822 43. Boehm M, Hoy B, Rohde M, Tegtmeyer N, Bæk KT, Oyarzabal OA, et al. Rapid  
823 paracellular transmigration of *Campylobacter jejuni* across polarized epithelial cells  
824 without affecting TER: role of proteolytic-active HtrA cleaving E-cadherin but not  
825 fibronectin. *Gut Pathogens*. 2012;4: 3. doi:10.1186/1757-4749-4-3
- 826 44. Alaniz RC, Deatherage BL, Lara JC, Cookson BT. Membrane Vesicles Are Immunogenic  
827 Facsimiles of *Salmonella typhimurium* That Potently Activate Dendritic Cells, Prime B  
828 and T Cell Responses, and Stimulate Protective Immunity In Vivo. *The Journal of*  
829 *Immunology*. 2007;179: 7692–7701. doi:10.4049/jimmunol.179.11.7692
- 830 45. Schild S, Nelson EJ, Camilli A. Immunization with *Vibrio cholerae* Outer Membrane  
831 Vesicles Induces Protective Immunity in Mice. *Infection and Immunity*. 2008;76: 4554–  
832 4563. doi:10.1128/IAI.00532-08
- 833 46. Camacho AI, de Souza J, Sánchez-Gómez S, Pardo-Ros M, Irache JM, Gamazo C. Mucosal  
834 immunization with *Shigella flexneri* outer membrane vesicles induced protection in mice.  
835 *Vaccine*. 2011;29: 8222–8229. doi:10.1016/j.vaccine.2011.08.121
- 836 47. Nieves W, Asakrah S, Qazi O, Brown KA, Kurtz J, AuCoin DP, et al. A naturally derived  
837 outer-membrane vesicle vaccine protects against lethal pulmonary *Burkholderia*  
838 *pseudomallei* infection. *Vaccine*. 2011;29: 8381–8389. doi:10.1016/j.vaccine.2011.08.058
- 839 48. Park SB, Jang HB, Nho SW, Cha IS, Hikima J, Ohtani M, et al. Outer Membrane Vesicles  
840 as a Candidate Vaccine against *Edwardsiella* infection. *PLOS ONE*. 2011;6: e17629.  
841 doi:10.1371/journal.pone.0017629

- 842 49. Roy K, Hamilton DJ, Munson GP, Fleckenstein JM. Outer Membrane Vesicles Induce  
843 Immune Responses to Virulence Proteins and Protect against Colonization by  
844 Enterotoxigenic *Escherichia coli*. *Clin Vaccine Immunol*. 2011;18: 1803–1808.  
845 doi:10.1128/CVI.05217-11
- 846 50. Avila-Calderón ED, Lopez-Merino A, Jain N, Peralta H, López-Villegas EO,  
847 Sriranganathan N, et al. Characterization of Outer Membrane Vesicles from *Brucella*  
848 *melitensis* and Protection Induced in Mice. In: *Clinical and Developmental Immunology*  
849 [Internet]. Hindawi; 29 Dec 2011 [cited 25 Sep 2020] p. e352493.  
850 doi:<https://doi.org/10.1155/2012/352493>
- 851 51. Collins BS. Gram-negative Outer Membrane Vesicles in Vaccine Development. *Discovery*  
852 *Medicine*. 2011;12: 7–15.
- 853 52. Granoff DM. Review of Meningococcal Group B Vaccines. *Clin Infect Dis*. 2010;50: S54–  
854 S65. doi:10.1086/648966
- 855 53. Mehrabi M, Montazeri H, Mohamadpour Dounighi N, Rashti A, Vakili-Ghartavol R.  
856 Chitosan-based Nanoparticles in Mucosal Vaccine Delivery. *Arch Razi Inst*. 2018;73: 165–  
857 176. doi:10.22092/ari.2017.109235.1101
- 858 54. Singh A, Nisaa K, Bhattacharyya S, Mallick AI. Immunogenicity and protective efficacy  
859 of mucosal delivery of recombinant hcp of *Campylobacter jejuni* Type VI secretion system  
860 (T6SS) in chickens. *Molecular Immunology*. 2019;111: 182–197.  
861 doi:10.1016/j.molimm.2019.04.016
- 862 55. Taheri N, Fällman M, Wai SN, Fahlgren A. Accumulation of virulence-associated proteins  
863 in *Campylobacter jejuni* Outer Membrane Vesicles at human body temperature. *Journal of*  
864 *Proteomics*. 2019;195: 33–40. doi:10.1016/j.jprot.2019.01.005

- 865 56. Zariri A, Beskers J, van de Waterbeemd B, Hamstra HJ, Bindels THE, van Riet E, et al.  
866 Meningococcal Outer Membrane Vesicle Composition-Dependent Activation of the Innate  
867 Immune Response. *Infect Immun*. 2016;84: 3024–3033. doi:10.1128/IAI.00635-16
- 868 57. Alshamsan A, Aleanizy FS, Badran M, Alqahtani FY, Alfassam H, Almalik A, et al.  
869 Exploring anti-MRSA activity of chitosan-coated liposomal dicloxacillin. *J Microbiol*  
870 *Methods*. 2019;156: 23–28. doi:10.1016/j.mimet.2018.11.015
- 871 58. Noroozi N, Mousavi Gargari SL, Nazarian S, Sarvary S, Rezaei R. Immunogenicity of  
872 enterotoxigenic *Escherichia coli* outer membrane vesicles encapsulated in chitosan  
873 nanoparticles. *Iranian Journal of Basic Medical Sciences*. 2018;21: 284–291.  
874 doi:10.22038/ijbms.2018.25886.6371
- 875 59. Pinto Reis C, Neufeld RJ, Ribeiro AJ, Veiga F. Nanoencapsulation II. Biomedical  
876 applications and current status of peptide and protein nanoparticulate delivery systems.  
877 *Nanomedicine: Nanotechnology, Biology and Medicine*. 2006;2: 53–65.  
878 doi:10.1016/j.nano.2006.04.009
- 879 60. Elgadir MA, Uddin MS, Ferdosh S, Adam A, Chowdhury AJK, Sarker MZI. Impact of  
880 chitosan composites and chitosan nanoparticle composites on various drug delivery  
881 systems: A review. *J Food Drug Anal*. 2015;23: 619–629. doi:10.1016/j.jfda.2014.10.008
- 882 61. Apter FM, Lencer WI, Finkelstein RA, Mekalanos JJ, Neutra MR. Monoclonal  
883 immunoglobulin A antibodies directed against cholera toxin prevent the toxin-induced  
884 chloride secretory response and block toxin binding to intestinal epithelial cells in vitro.  
885 *Infect Immun*. 1993;61: 5271–5278. doi:10.1128/IAI.61.12.5271-5278.1993
- 886 62. Helander A, Miller CL, Myers KS, Neutra MR, Nibert ML. Protective immunoglobulin A  
887 and G antibodies bind to overlapping intersubunit epitopes in the head domain of type 1

- 888 reovirus adhesin sigma1. *J Virol.* 2004;78: 10695–10705. doi:10.1128/JVI.78.19.10695-  
889 10705.2004
- 890 63. Hutchings AB, Helander A, Silvey KJ, Chandran K, Lucas WT, Nibert ML, et al. Secretory  
891 immunoglobulin A antibodies against the sigma1 outer capsid protein of reovirus type 1  
892 Lang prevent infection of mouse Peyer's patches. *J Virol.* 2004;78: 947–957.  
893 doi:10.1128/jvi.78.2.947-957.2004
- 894 64. Mantis NJ, McGuinness CR, Sonuyi O, Edwards G, Farrant SA. Immunoglobulin A  
895 antibodies against ricin A and B subunits protect epithelial cells from ricin intoxication.  
896 *Infect Immun.* 2006;74: 3455–3462. doi:10.1128/IAI.02088-05
- 897 65. Stubbe H, Berdoz J, Kraehenbuhl JP, Corthésy B. Polymeric IgA is superior to monomeric  
898 IgA and IgG carrying the same variable domain in preventing *Clostridium difficile* toxin  
899 A damaging of T84 monolayers. *J Immunol.* 2000;164: 1952–1960.  
900 doi:10.4049/jimmunol.164.4.1952
- 901 66. Uren TK, Wijburg OLC, Simmons C, Johansen F-E, Brandtzaeg P, Strugnell RA. Vaccine-  
902 induced protection against gastrointestinal bacterial infections in the absence of secretory  
903 antibodies. *Eur J Immunol.* 2005;35: 180–188. doi:10.1002/eji.200425492
- 904 67. Lycke N, Erlandsson L, Ekman L, Schön K, Leanderson T. Lack of J chain inhibits the  
905 transport of gut IgA and abrogates the development of intestinal antitoxic protection. *J*  
906 *Immunol.* 1999;163: 913–919.
- 907 68. Strugnell RA, Wijburg OLC. The role of secretory antibodies in infection immunity.  
908 *Nature Reviews Microbiology.* 2010;8: 656–667. doi:10.1038/nrmicro2384

- 909 69. Macpherson AJ, McCoy KD, Johansen F-E, Brandtzaeg P. The immune geography of IgA  
910 induction and function. *Mucosal Immunology*. 2008;1: 11–22. doi:10.1038/mi.2007.6
- 911 70. Janeway CA. Approaching the asymptote? Evolution and revolution in immunology. *Cold*  
912 *Spring Harb Symp Quant Biol*. 1989;54 Pt 1: 1–13. doi:10.1101/sqb.1989.054.01.003
- 913 71. Pulendran B, Ahmed R. Translating innate immunity into immunological memory:  
914 implications for vaccine development. *Cell*. 2006;124: 849–863.  
915 doi:10.1016/j.cell.2006.02.019
- 916 72. Wen Z-S, Xu Y-L, Zou X-T, Xu Z-R. Chitosan Nanoparticles Act as an Adjuvant to  
917 Promote both Th1 and Th2 Immune Responses Induced by Ovalbumin in Mice. *Marine*  
918 *Drugs*. 2011;9: 1038–1055. doi:10.3390/md9061038
- 919 73. Mitra S, Sinha R, Nag D, Koley H. Immunomodulatory role of outer membrane vesicles  
920 of *Shigella* in mouse model. *Trials in Vaccinology*. 2015;4: 56–60.  
921 doi:10.1016/j.trivac.2015.07.001
- 922 74. Wang X, Singh AK, Zhang X, Sun W. Induction of Protective Antiplague Immune  
923 Responses by Self-Adjuvanting Bionanoparticles Derived from Engineered *Yersinia*  
924 *pestis*. *Infection and Immunity*. 2020;88. doi:10.1128/IAI.00081-20
- 925 75. Macpherson AJ, Smith K. Mesenteric lymph nodes at the center of immune anatomy. *J*  
926 *Exp Med*. 2006;203: 497–500. doi:10.1084/jem.20060227
- 927 76. Nochi T, Jansen CA, Toyomizu M, Eden W van. The Well-Developed Mucosal Immune  
928 Systems of Birds and Mammals Allow for Similar Approaches of Mucosal Vaccination in  
929 Both Types of Animals. *Front Nutr*. 2018;5. doi:10.3389/fnut.2018.00060



- 930 77. Guthrie T, Wong SYC, Liang B, Hyland L, Hou S, Høiby EA, et al. Local and Systemic  
931 Antibody Responses in Mice Immunized Intranasally with Native and Detergent-Extracted  
932 Outer Membrane Vesicles from *Neisseria meningitidis*. *Infection and Immunity*. 2004;72:  
933 2528–2537. doi:10.1128/IAI.72.5.2528-2537.2004
- 934 78. Smith-Garvin JE, Koretzky GA, Jordan MS. T cell activation. *Annu Rev Immunol*.  
935 2009;27: 591–619. doi:10.1146/annurev.immunol.021908.132706
- 936 79. von Boehmer H. Selection of the T-cell repertoire: receptor-controlled checkpoints in T-  
937 cell development. *Adv Immunol*. 2004;84: 201–238. doi:10.1016/S0065-2776(04)84006-  
938 9
- 939 80. Baqar S, Rice B, Lee L, Bourgeois AL, Amina NED, Tribble DR, et al. *Campylobacter*  
940 *jejuni* Enteritis. *Clin Infect Dis*. 2001;33: 901–905. doi:10.1086/322594
- 941 81. Hu L, Bray MD, Osorio M, Kopecko DJ. *Campylobacter jejuni* Induces Maturation and  
942 Cytokine Production in Human Dendritic Cells. *Infection and Immunity*. 2006;74: 2697–  
943 2705. doi:10.1128/IAI.74.5.2697-2705.2006
- 944 82. Hammarström V, Smith CI, Hammarström L. Oral immunoglobulin treatment in  
945 *Campylobacter jejuni* enteritis. *Lancet*. 1993;341: 1036.
- 946 83. Reome JB, Johnston DS, Helmich BK, Morgan TM, Dutton-Swain N, Dutton RW. The  
947 Effects of Prolonged Administration of 5-Bromodeoxyuridine on Cells of the Immune  
948 System. *The Journal of Immunology*. 2000;165: 4226–4230.  
949 doi:10.4049/jimmunol.165.8.4226

- 950 84. Naess LM, Oftung F, Aase A, Wetzler LM, Sandin R, Michaelsen TE. Human T-cell  
951 responses after vaccination with the Norwegian group B meningococcal outer membrane  
952 vesicle vaccine. *Infect Immun.* 1998;66: 959–965. doi:10.1128/IAI.66.3.959-965.1998
- 953 85. Oftung F, Naess LM, Wetzler LM, Korsvold GE, Aase A, Høiby EA, et al. Antigen-  
954 specific T-cell responses in humans after intranasal immunization with a meningococcal  
955 serogroup B outer membrane vesicle vaccine. *Infect Immun.* 1999;67: 921–927.  
956 doi:10.1128/IAI.67.2.921-927.1999
- 957 86. Imayoshi R, Cho T, Kaminishi H. NO production in RAW264 cells stimulated with  
958 *Porphyromonas gingivalis* extracellular vesicles. *Oral Diseases.* 2011;17: 83–89.  
959 doi:10.1111/j.1601-0825.2010.01708.x
- 960 87. Cecil JD, O'Brien-Simpson NM, Lenzo JC, Holden JA, Chen Y-Y, Singleton W, et al.  
961 Differential Responses of Pattern Recognition Receptors to Outer Membrane Vesicles of  
962 Three Periodontal Pathogens. *PLOS ONE.* 2016;11: e0151967.  
963 doi:10.1371/journal.pone.0151967
- 964 88. Rosen G, Sela MN, Naor R, Halabi A, Barak V, Shapira L. Activation of Murine  
965 Macrophages by Lipoprotein and Lipooligosaccharide of *Treponema denticola*. *Infection*  
966 *and Immunity.* 1999;67: 1180–1186. doi:10.1128/IAI.67.3.1180-1186.1999
- 967 89. Iovine NM, Pursnani S, Voldman A, Wasserman G, Blaser MJ, Weinrauch Y. Reactive  
968 Nitrogen Species Contribute to Innate Host Defense against *Campylobacter jejuni*.  
969 *Infection and Immunity.* 2008;76: 986–993. doi:10.1128/IAI.01063-07
- 970 90. Ellis TN, Kuehn MJ. Virulence and Immunomodulatory Roles of Bacterial Outer  
971 Membrane Vesicles. *Microbiol Mol Biol Rev.* 2010;74: 81–94.  
972 doi:10.1128/MMBR.00031-09

- 973 91. Sonnenberg GF, Monticelli LA, Alenghat T, Fung TC, Hutnick NA, Kunisawa J, et al.  
974 Innate lymphoid cells promote anatomical containment of lymphoid-resident commensal  
975 bacteria. *Science*. 2012;336: 1321–1325. doi:10.1126/science.1222551
- 976 92. Geddes K, Rubino SJ, Magalhaes JG, Streutker C, Le Bourhis L, Cho JH, et al.  
977 Identification of an innate T helper type 17 response to intestinal bacterial pathogens. *Nat*  
978 *Med*. 2011;17: 837–844. doi:10.1038/nm.2391
- 979 93. Mayuzumi H, Inagaki-Ohara K, Uyttenhove C, Okamoto Y, Matsuzaki G. Interleukin-17A  
980 is required to suppress invasion of *Salmonella enterica* serovar Typhimurium to enteric  
981 mucosa. *Immunology*. 2010;131: 377–385. doi:10.1111/j.1365-2567.2010.03310.x
- 982 94. Song X, Zhu S, Shi P, Liu Y, Shi Y, Levin SD, et al. IL-17RE is the functional receptor  
983 for IL-17C and mediates mucosal immunity to infection with intestinal pathogens. *Nat*  
984 *Immunol*. 2011;12: 1151–1158. doi:10.1038/ni.2155
- 985 95. Zhu J, Yamane H, Paul WE. Differentiation of Effector CD4 T Cell Populations. *Annu*  
986 *Rev Immunol*. 2010;28: 445–489. doi:10.1146/annurev-immunol-030409-101212
- 987 96. Sallusto F, Lanzavecchia A. Heterogeneity of CD4+ memory T cells: Functional modules  
988 for tailored immunity. *European Journal of Immunology*. 2009;39: 2076–2082.  
989 doi:10.1002/eji.200939722
- 990 97. Sallusto F, Geginat J, Lanzavecchia A. Central memory and effector memory T cell  
991 subsets: function, generation, and maintenance. *Annu Rev Immunol*. 2004;22: 745–763.  
992 doi:10.1146/annurev.immunol.22.012703.104702

- 993 98. Helmbly H, Grecnis RK. IFN- $\gamma$ -Independent Effects of IL-12 During Intestinal Nematode  
994 Infection. *The Journal of Immunology*. 2003;171: 3691–3696.  
995 doi:10.4049/jimmunol.171.7.3691
- 996 99. Kirkpatrick BD, Tribble DR. Update on human *Campylobacter jejuni* infections. *Current*  
997 *Opinion in Gastroenterology*. 2011;27: 1–7. doi:10.1097/MOG.0b013e3283413763
- 998 100. Hamza E, Kittl S, Kuhnert P. Temporal induction of pro-inflammatory and regulatory  
999 cytokines in human peripheral blood mononuclear cells by *Campylobacter jejuni* and  
1000 *Campylobacter coli*. *PLOS ONE*. 2017;12: e0171350. doi:10.1371/journal.pone.0171350
- 1001 101. Rincón M, Anguita J, Nakamura T, Fikrig E, Flavell RA. Interleukin (IL)-6 Directs the  
1002 Differentiation of IL-4–producing CD4+ T Cells. *J Exp Med*. 1997;185: 461–470.  
1003 doi:10.1084/jem.185.3.461
- 1004 102. Watson SW, Novitsky TJ, Quinby HL, Valois FW. Determination of bacterial number  
1005 and biomass in the marine environment. *Applied and Environmental Microbiology*.  
1006 1977;33: 940.
- 1007 103. Leker K, Lozano-Pope I, Bandyopadhyay K, Choudhury BP, Obonyo M. Comparison  
1008 of lipopolysaccharides composition of two different strains of *Helicobacter pylori*. *BMC*  
1009 *Microbiology*. 2017;17: 226. doi:10.1186/s12866-017-1135-y
- 1010 104. Fagarasan S, Kawamoto S, Kanagawa O, Suzuki K. Adaptive immune regulation in the  
1011 gut: T cell-dependent and T cell-independent IgA synthesis. *Annual Review of*  
1012 *Immunology*. 2010;28: 243–273. doi:10.1146/annurev-immunol-030409-101314

- 1013 105. Benckert J, Schmolka N, Kreschel C, Zoller MJ, Sturm A, Wiedenmann B, et al. The  
1014 majority of intestinal IgA<sup>+</sup> and IgG<sup>+</sup> plasmablasts in the human gut are antigen-specific.  
1015 *The Journal of Clinical Investigation*. 2011;121: 1946–1955. doi:10.1172/JCI44447
- 1016 106. Pabst O. New concepts in the generation and functions of IgA. *Nature Reviews*  
1017 *Immunology*. 2012;12: 821–832. doi:10.1038/nri3322
- 1018 107. Geboes K. Histopathology of Crohn’s Disease and Ulcerative Colitis. *IBD4E*. 2003;  
1019 18:255-276.
- 1020 108. Chatterjee D, Chaudhuri K. Association of cholera toxin with *Vibrio cholerae* outer  
1021 membrane vesicles which are internalized by human intestinal epithelial cells. *FEBS*  
1022 *Letters*. 2011;585: 1357–1362. doi:10.1016/j.febslet.2011.04.017
- 1023 109. Singh A, Mallick AI. Role of putative virulence traits of *Campylobacter jejuni* in  
1024 regulating differential host immune responses. *J Microbiol*. 2019;57: 298–309.  
1025 doi:10.1007/s12275-019-8165-0
- 1026 110. Al-Manasir N, Zhu K, Kjøniksen A-L, Knudsen KD, Karlsson G, Nyström B. Effects  
1027 of Temperature and pH on the Contraction and Aggregation of Microgels in Aqueous  
1028 Suspensions. *J Phys Chem B*. 2009;113: 11115–11123. doi:10.1021/jp901121g
- 1029 111. Schrøder TD, Long Y, Olsen LF. Experimental and model study of the formation of  
1030 chitosan-tripolyphosphate-siRNA nanoparticles. *Colloid Polym Sci*. 2014;292: 2869–  
1031 2880. doi:10.1007/s00396-014-3331-8
- 1032 112. Lee JTY, Chow KL. SEM sample preparation for cells on 3D scaffolds by freeze-drying  
1033 and HMDS. *Scanning*. 2012;34: 12–25. doi:10.1002/sca.20271

- 1034 113. Martínez-Gómez F, Santiago-Rosales R, Ramón Bautista-Garfias C. Effect of  
1035 *Lactobacillus casei* Shirota strain intraperitoneal administration in CD1 mice on the  
1036 establishment of *Trichinella spiralis* adult worms and on IgA anti-*T. spiralis* production.  
1037 *Veterinary Parasitology*. 2009;162: 171–175. doi:10.1016/j.vetpar.2009.02.010
- 1038 114. Grewal HMS, Hemming Karlsen T, Vetvik H, Åhrén C, Gjessing HK, Sommerfelt H,  
1039 et al. Measurement of specific IgA in faecal extracts and intestinal lavage fluid for  
1040 monitoring of mucosal immune responses. *Journal of Immunological Methods*. 2000;239:  
1041 53–62. doi:10.1016/S0022-1759(00)00171-X
- 1042 115. Mookerjee A, Sen PC, Ghose AC. Immunosuppression in Hamsters with Progressive  
1043 Visceral Leishmaniasis Is Associated with an Impairment of Protein Kinase C Activity in  
1044 Their Lymphocytes That Can Be Partially Reversed by Okadaic Acid or Anti-  
1045 Transforming Growth Factor  $\beta$  Antibody. *Infection and Immunity*. 2003;71: 2439–2446.  
1046 doi:10.1128/IAI.71.5.2439-2446.2003
- 1047 116. Vaillier D, Daculsi R, Gualdel N. Nitric oxide production in murine spleen cells: role  
1048 of interferons and prostaglandin E2 in the generation of cytotoxic activity. In: *Mediators*  
1049 *of Inflammation* [Internet]. Hindawi; 1996 [cited 26 Sep 2020] pp. 62–68.  
1050 doi:<https://doi.org/10.1155/S0962935196000117>
- 1051 117. Hensel JA, Khattar V, Ashton R, Ponnazhagan S. Characterization of immune cell  
1052 subtypes in three commonly used mouse strains reveals gender and strain-specific  
1053 variations. *Laboratory Investigation*. 2019;99: 93–106. doi:10.1038/s41374-018-0137-1
- 1054 118. Macedo NJ, Ferreira TL. Maximizing Total RNA Yield from TRIzol® Reagent  
1055 Protocol: A Feasibility Study. 2014; 8.

- 1056 119. Grinstein M, Dingwall HL, Shah RR, Capellini TD, Galloway JL. A robust method for  
1057 RNA extraction and purification from a single adult mouse tendon. *PeerJ*. 2018;6: e4664.  
1058 doi:10.7717/peerj.4664
- 1059 120. Liu W, Zhang Y, Zhu W, Ma C, Ruan J, Long H, et al. Sinomenine Inhibits the  
1060 Progression of Rheumatoid Arthritis by Regulating the Secretion of Inflammatory  
1061 Cytokines and Monocyte/Macrophage Subsets. *Front Immunol*. 2018;9.  
1062 doi:10.3389/fimmu.2018.02228
- 1063 121. Espinosa-Ramos D, Caballero-Hernández D, Gomez-Flores R, Trejo-Chávez A, Pérez-  
1064 Limón LJ, de la Garza-Ramos MA, et al. Immunization with a Synthetic *Helicobacter*  
1065 *pylori* Peptide Induces Secretory IgA Antibodies and Protects Mice against Infection. In:  
1066 *Canadian Journal of Infectious Diseases and Medical Microbiology* [Internet]. Hindawi; 1  
1067 Apr 2019 [cited 26 Sep 2020] p. e8595487. doi:<https://doi.org/10.1155/2019/8595487>
- 1068 122. Mantis NJ, Rol N, Corthésy B. Secretory IgA's complex roles in immunity and mucosal  
1069 homeostasis in the gut. *Mucosal Immunology*. 2011;4: 603–611. doi:10.1038/mi.2011.41
- 1070 123. Gnopo YMD, Misra A, Hsu H-L, DeLisa MP, Daniel S, Putnam D. Induced fusion and  
1071 aggregation of bacterial outer membrane vesicles: Experimental and theoretical analysis.  
1072 *Journal of Colloid and Interface Science*. 2020;578: 522–532.  
1073 doi:10.1016/j.jcis.2020.04.068
- 1074 124. Jafarlou M, Baradaran B, Shanehbandi D, Saedi TA, Jafarlou V, Ismail P, et al. siRNA-  
1075 mediated inhibition of survivin gene enhances the anti-cancer effect of etoposide in U-937  
1076 acute myeloid leukemia cells. *Cellular and Molecular Biology (Noisy-Le-Grand, France)*.  
1077 2016;62: 44–49.

1078 **Legends:**

1079 **Table:**

1080 **Table 1.** List of the primers used in the present study.

1081 **Table 2.** Biophysical characteristics of OMVs and CS-OMVs by DLS, SEM, and TEM  
1082 analysis.

1083 **Table 3.** Mean percentage of total T cells and other subsets population (Th, Tc, and Th17)  
1084 among different experimental groups.

1085 **Figures:**

1086 **Fig 1. Effect of OMVs on *C. jejuni* invasion of human INT407 cells.** The confluent  
1087 monolayer of human INT407 cells was co-incubated with different concentrations of OMVs (5  
1088  $\mu\text{g}/\text{mL}$ , 10  $\mu\text{g}/\text{mL}$ , and 20  $\mu\text{g}/\text{mL}$ ) and *C. jejuni* (MOI 1:100) for 3 h at 37 °C in the presence  
1089 of 5 %  $\text{CO}_2$ . After 3 h, cells were washed and treated with gentamicin (150  $\mu\text{g}/\text{mL}$ ) to kill  
1090 extracellular and adhered bacteria, followed by incubation for an additional 2 h. Post  
1091 incubation, infected cells were lysed with 1 % Triton-X 100 to recover the invaded bacteria  
1092 present intracellularly. Data indicate a significant increase in *C. jejuni* invasion of host cells in  
1093 the presence of OMVs when compared to *C. jejuni* alone. The assay was performed in triplicate,  
1094 and regression value ( $R^2 = 0.74$ ) was calculated through a non-linear regression curve using  
1095 GraphPad Prism software (Version 8). Data represent Mean CFU/mL  $\pm$  SE of two independent  
1096 experiments. Asterisks indicate a statistically significant difference ( $**P \leq 0.01$ ) with respect  
1097 to *C. jejuni* alone (without co-incubation with OMVs).

1098 **Fig 2. Morphological features and size distribution of OMVs and CS-OMVs by FESEM**  
1099 **and TEM analysis.** (A) Scanning Electron micrograph of OMVs (a) and CS-OMVs (b) shows  
1100 the spherical shape of the isolated OMVs. The statistical analysis of vesicle size distribution  
1101 using image J software shows an average size of  $\sim 110$  nm (c) and  $\sim 157$  nm (d) for the free



1102 OMVs and CS coated OMVs, respectively. **(B)** Transmission Electron micrograph of OMVs  
1103 (a) and CS-OMVs (b) shows spherical shaped vesicles with the average size for OMVs ~ 130  
1104 nm (a) whereas for CS-OMVs ~165 nm (b). The scale bar is 200 nm.

1105 **Fig 3. Mice immunization schedule and antibody responses.** **(A)** Schematic representation  
1106 of the mice immunization regimen used in this study. The experimental mice were immunized  
1107 at indicated time intervals. Circle (●) and triangle (▲) indicate the time points of mice sampling  
1108 and sacrifice, respectively. At day 28 post first immunization (p.i.), half of the mice were  
1109 sacrificed to obtain blood, intestinal lavages, faecal pellets, spleen, and mLN samples, whereas  
1110 on day 35 p.i. the remaining mice were sacrificed to collect cecum. **(B-D)** Comparison of  
1111 OMVs specific mucosal (sIgA) and systemic (IgG) immune responses in the samples collected  
1112 at day 7 post last immunization. **(B)** The mean sIgA antibody titre in intestinal lavages (1:8  
1113 dilution) and **(C)** faecal soup (1:16 dilution) obtained from the mice of each experimental group  
1114 showed a substantial increment in sIgA levels in mice either immunized orally with CS-OMVs  
1115 or injected (s/c) with IFA-OMVs compared to the control mice those received PBS only. **(D)**  
1116 Comparative analysis of serum IgG isotypic profile based on IgG1, IgG2a, and IgG2b  
1117 subclasses among different groups showed a significantly higher systemic antibody response  
1118 and indicated a balanced Th1/Th2 profile (Immunized Vs Controls). Each bar represents the  
1119 mean antibody titre in the sera samples (1:40 dilution) collected from different experimental  
1120 groups. Data represent Mean absorbance (A450) ± SE of two independent experiments.  
1121 Asterisks indicate a statistically significant difference (\*\* $P \leq 0.01$ ) with respect to the PBS  
1122 control group.

1123 **Fig 4. *In vitro* splenocyte (lymphocyte) proliferation and NO production.** **(A)** OMVs  
1124 specific cell-mediated immune responses were measured by BrdU incorporation into nucleic  
1125 acids of proliferating lymphocytes collected from different experimental mice. At day 7 post  
1126 last immunization, splenocytes were stimulated with 1 µg/mL of OMVs. The assay was

1127 performed in triplicate, and data represent Mean stimulation index  $\pm$  SE of two independent  
1128 experiments. Asterisks indicate a statistically significant difference (\*\* $P \leq 0.01$ ) with respect  
1129 to control mice (PBS group). **(B)** A dose-dependent increase of NO production in the culture  
1130 supernatant of splenocytes treated with OMVs. One week post last immunization, splenocytes  
1131 collected from mice belonging to different feeding groups were treated with varying  
1132 concentrations of OMVs (0.1  $\mu\text{g/mL}$ , 0.5  $\mu\text{g/mL}$ , and 1  $\mu\text{g/mL}$ ) for 48 h. After treatment,  
1133 culture supernatants were collected and assayed for NO production with the Griess reagent.  
1134 The assay was performed in triplicate, and data represent Mean NO production  $\pm$  SE of two  
1135 independent experiments. Asterisks indicate a statistically significant difference ( $*P \leq 0.05$ ,  
1136 \*\* $P \leq 0.01$ ) with respect to the control mice (PBS group).

1137 **Fig 5. Immunophenotyping of T cells and their subsets by Flow cytometry.** Splenocytes  
1138 collected at day 7 post last immunization from mice belonging to immunized and unimmunized  
1139 groups were stained with CD3-FITC, CD4-APC, CD8-PE, CD196-eFluor 660 monoclonal  
1140 antibodies to count the population of total T cells, Th cells, Tc cells, and Th17 cells  
1141 respectively. Lymphocytes were gated on the basis of their FSC-A and SSC-A. **(A)**  
1142 Flowcytometric analysis showing a gated plot for total T cells (CD3 FITC) in splenocytes  
1143 obtained from different experimental groups. For immunophenotypic profiles of Th and Tc  
1144 cells, triple-staining was performed (CD3-FITC, CD4-APC, CD8-PE), whereas, for Th17 cells,  
1145 double-staining was done (CD3-FITC, CD196-eFluor 660). **(B)** Gated plot for Th cells (CD4  
1146 APC), Tc cells (CD8 PE), and Th17 cells (eFlour 660) for various experimental groups.  
1147 Channels FL1, FL2 were used as filters or detectors for FITC, PE-labeled antibodies,  
1148 respectively, whereas channel FL4 was common for APC and eFlour 660 labeled antibodies.

1149 **Fig 6. Comparative analysis of gene expression profile in experimental mice.** Mesenteric  
1150 lymph nodes collected at day 7 post last immunization were processed for transcriptional  
1151 analysis of TLR 4, IL-6, IFN- $\gamma$ , and IL-4 genes. **(A)** Fold changes of gene expression in

1152 response to immunization with only CS, CS-OMVs, and IFA-OMVs. Fold changes were  
1153 calculated with respect to the control group (mice received PBS only). Data represent Mean  
1154 fold change  $\pm$  SE of two independent experiments. Asterisks indicate a statistically significant  
1155 difference ( $*P \leq 0.05$ ,  $**P \leq 0.01$ ) with respect to the PBS group. **(B)** Agarose gel images (1  
1156 % agarose) of PCR amplified products using gene-specific primers showing the expression of  
1157 mRNA of TLR-4 and cytokines (IL-6, IFN- $\gamma$ , and IL-4). Data represent gel images of two  
1158 independent experiments.

1159 **Fig 7: Immune-protective efficacy and histopathological changes in mice immunized with**  
1160 **OMVs and challenged with *C. jejuni*.** **(A)** Experimental mice were challenged with highly  
1161 pathogenic 18aM *C. jejuni* isolate ( $1 \times 10^8$  CFU/mice) and sacrificed at day 7 post last  
1162 immunization. The normalized CFU/gm of cecum/mice in each experimental group was  
1163 determined at day 7 post-challenge with *C. jejuni*. The number of viable *C. jejuni* recovered  
1164 from the cecal content of different experimental groups showed a significant reduction in the  
1165 bacterial load of mice orally administered with CS-OMVs followed by those received  
1166 subcutaneous injection of IFA-OMVs as compared to the control groups (CS or PBS only).  
1167 Data represent normalized CFU/gm  $\pm$  SE of three independent experiments. Asterisks indicate  
1168 a statistically significant difference in comparison to the PBS control group ( $**P \leq 0.01$ ). **(B)**  
1169 Representative images of histopathological changes in cecal tissue collected at day 7 post-  
1170 challenge with *C. jejuni*. Haematoxylin-and-Eosin (H&E) stained tissue sections showed  
1171 desquamation of villi, focal necrosis, and degeneration of Peyer's patches in mice administered  
1172 with CS or PBS only. However, cecal tissues from mice immunized with CS-OMVs and IFA-  
1173 OMVs indicates only minor changes in the morphology of villi and tissue architecture with  
1174 diffuse infiltration of plasma cells. **(C)** *In vitro* neutralization of *C. jejuni* by OMVs specific  
1175 local antibody (sIgA) present in the faecal soup of mice immunized with OMVs either orally  
1176 or systemically showed a significantly low number of *C. jejuni* (adhered + invaded) associated

1177 with human INT407 cells compared to the control groups. Data represent normalized CFU/mL  
1178  $\pm$  SE of two independent experiments. Asterisks indicate a significant difference (\* $P \leq 0.05$ ,  
1179 \*\* $P \leq 0.01$ ) statistically with respect to the PBS group.

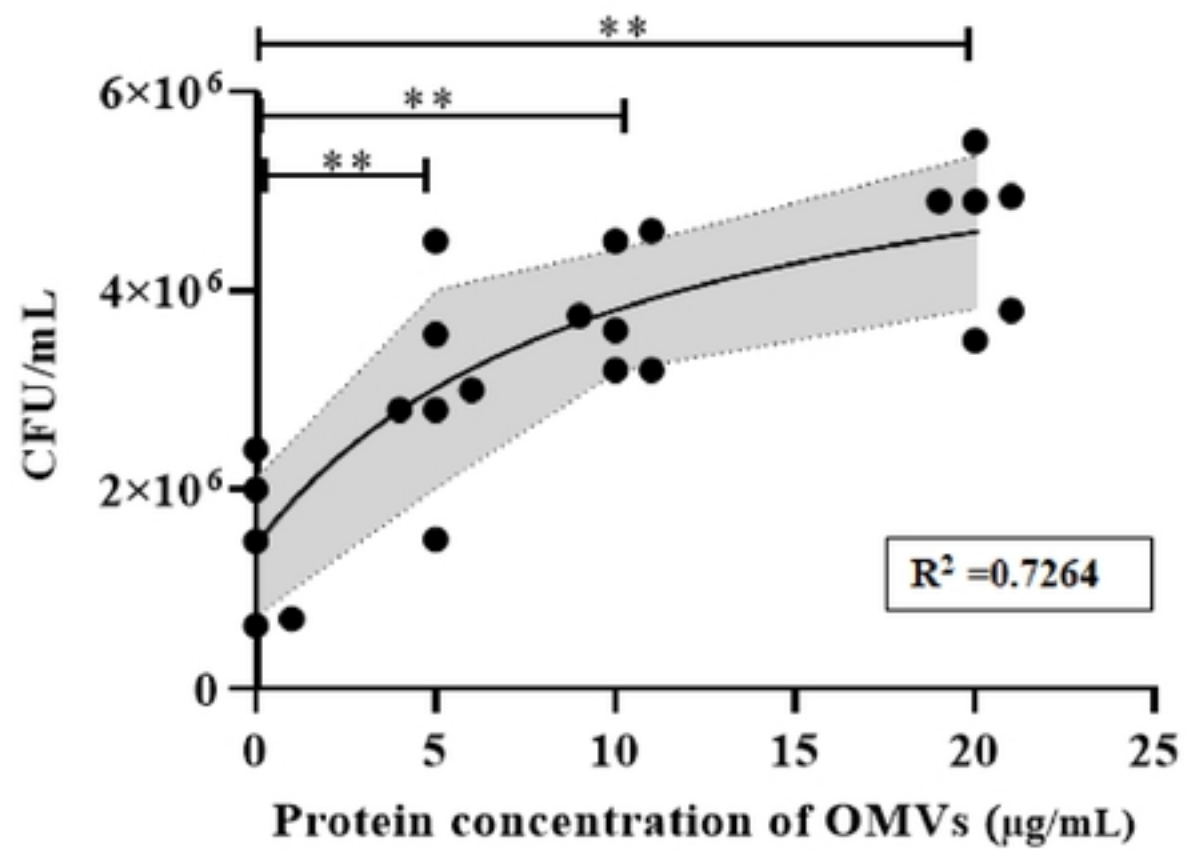

Figure 1

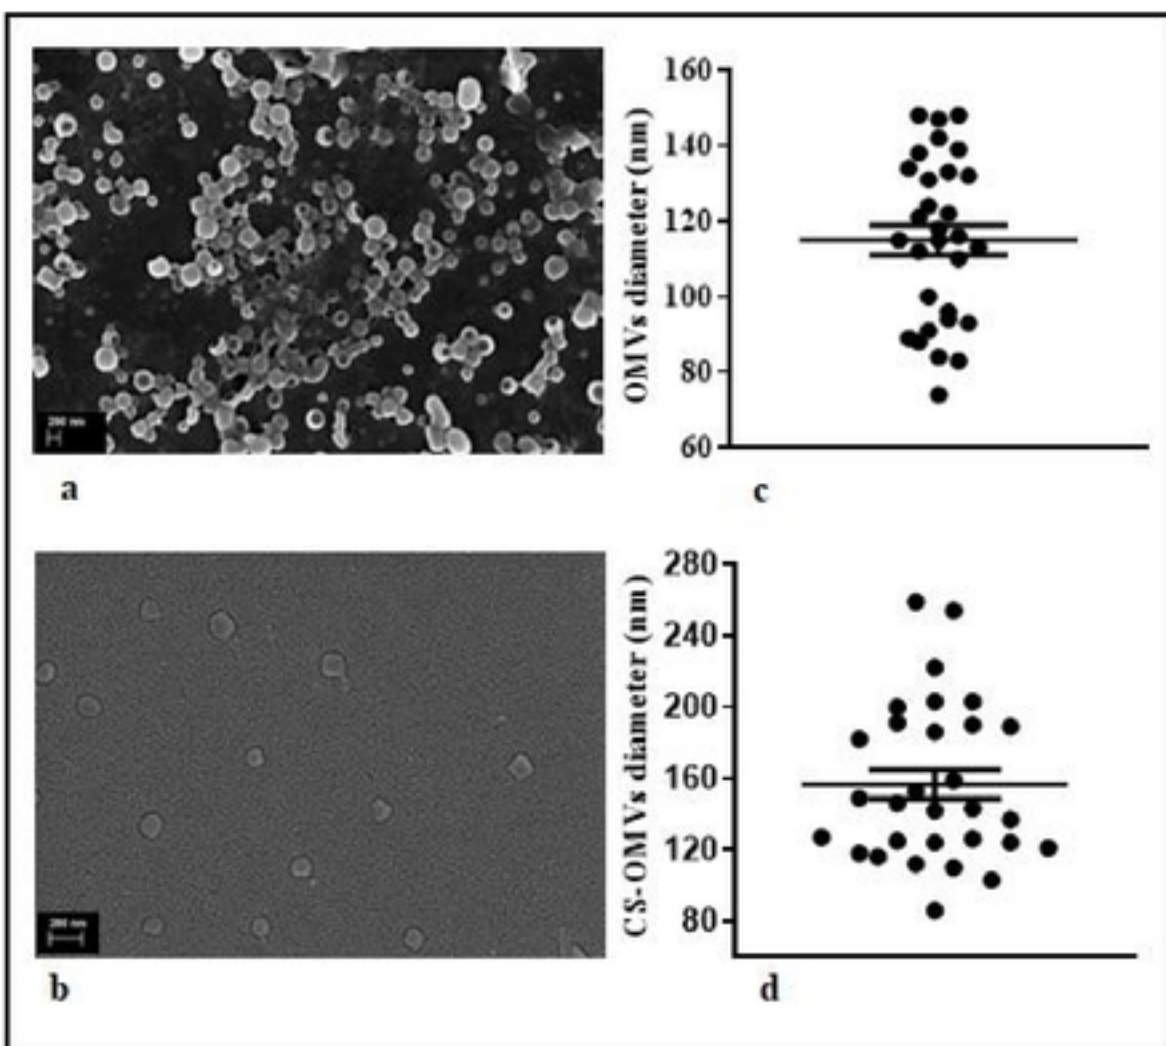

Panel A

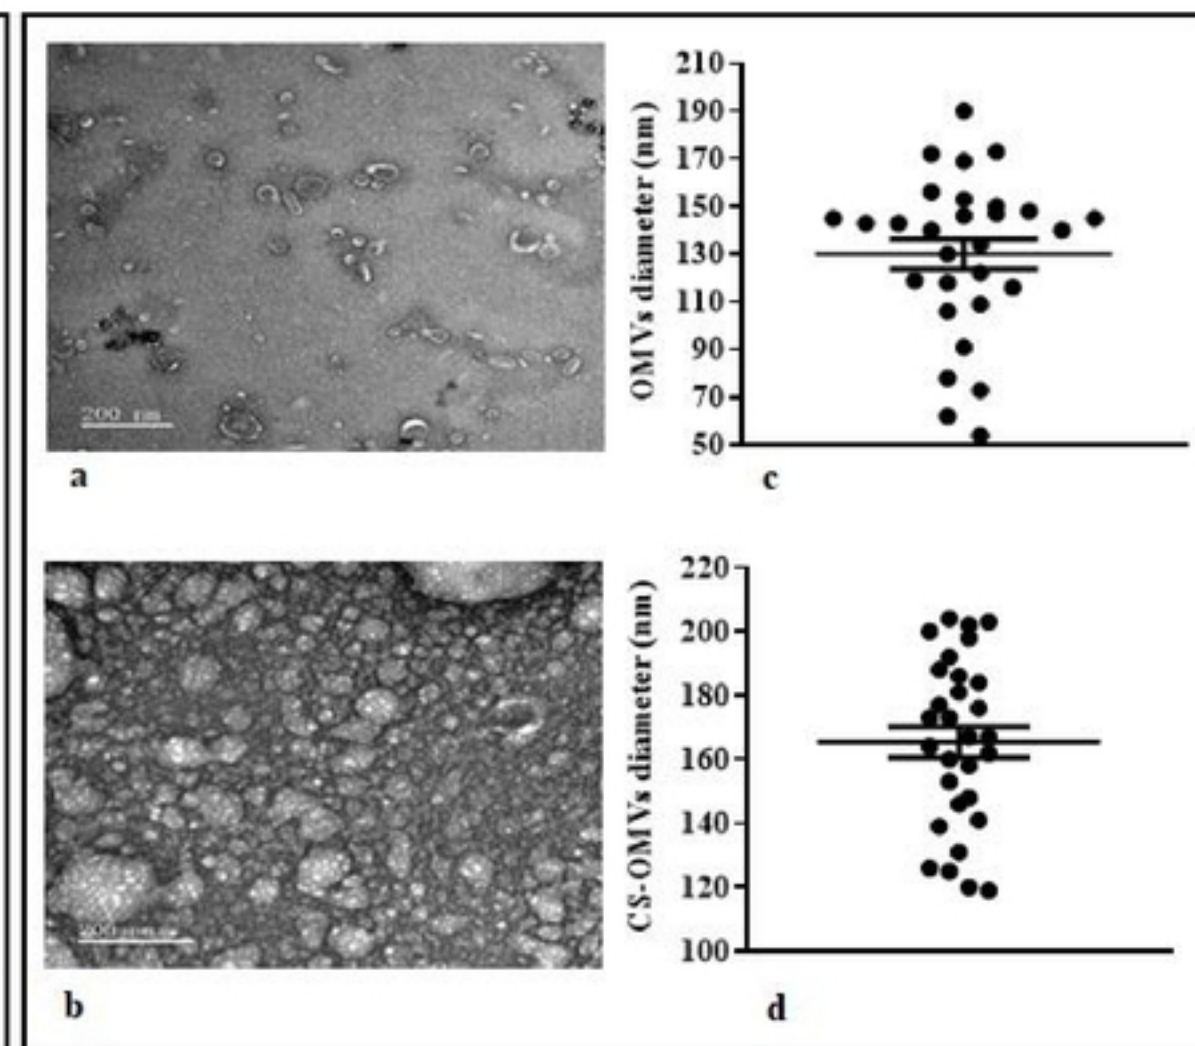

Panel B

Figure 2

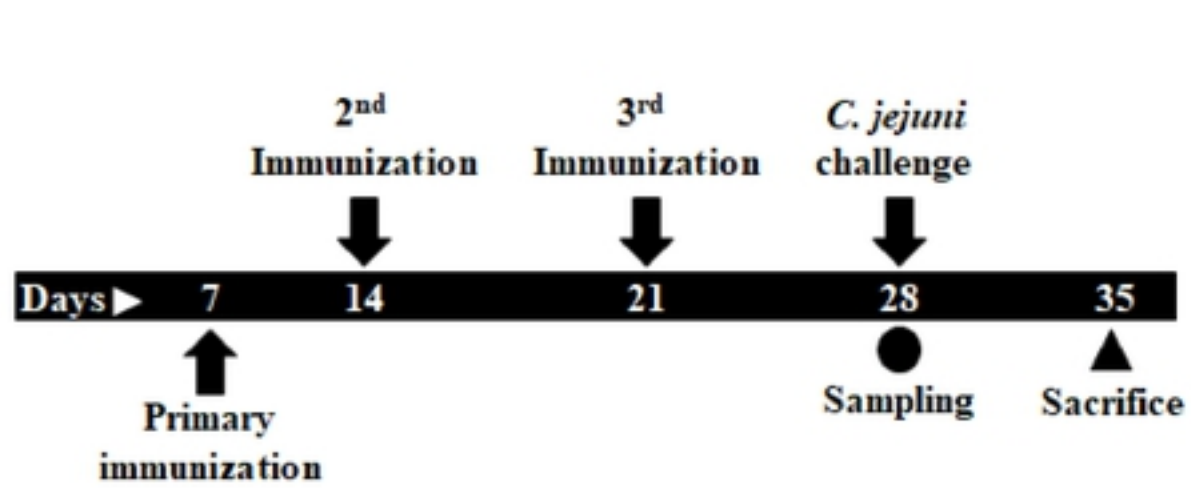

Panel A

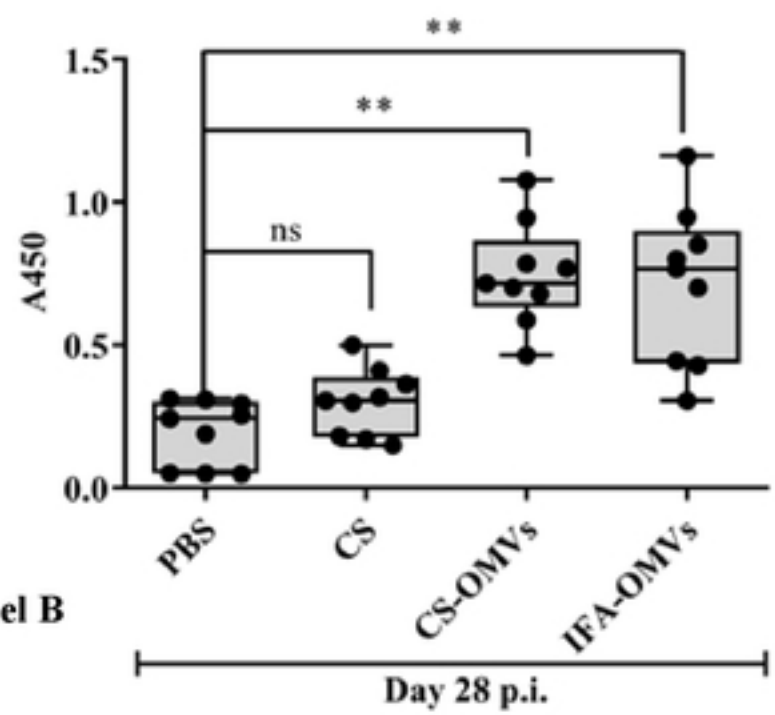

Panel B

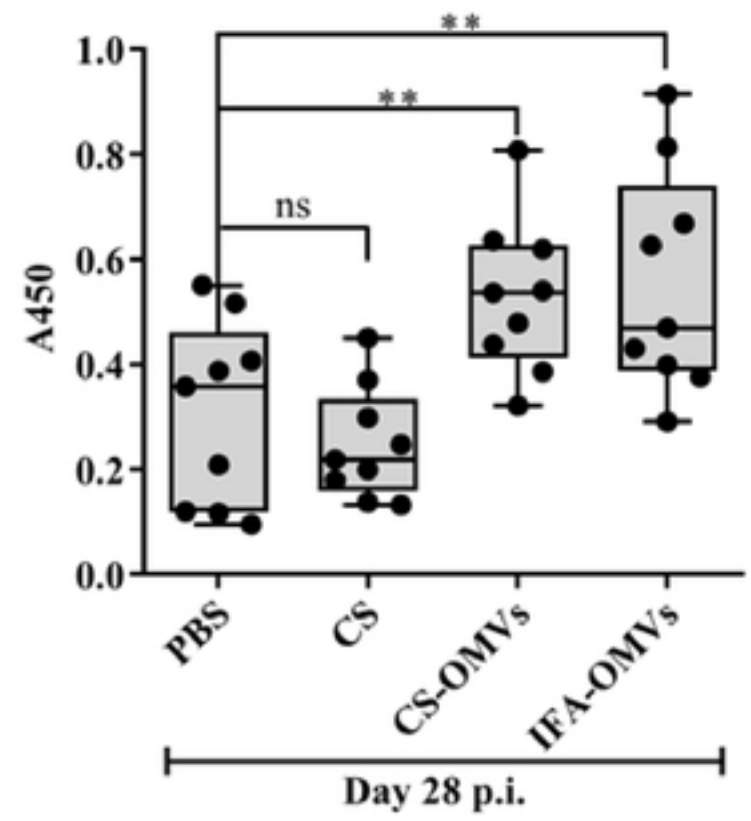

Panel C

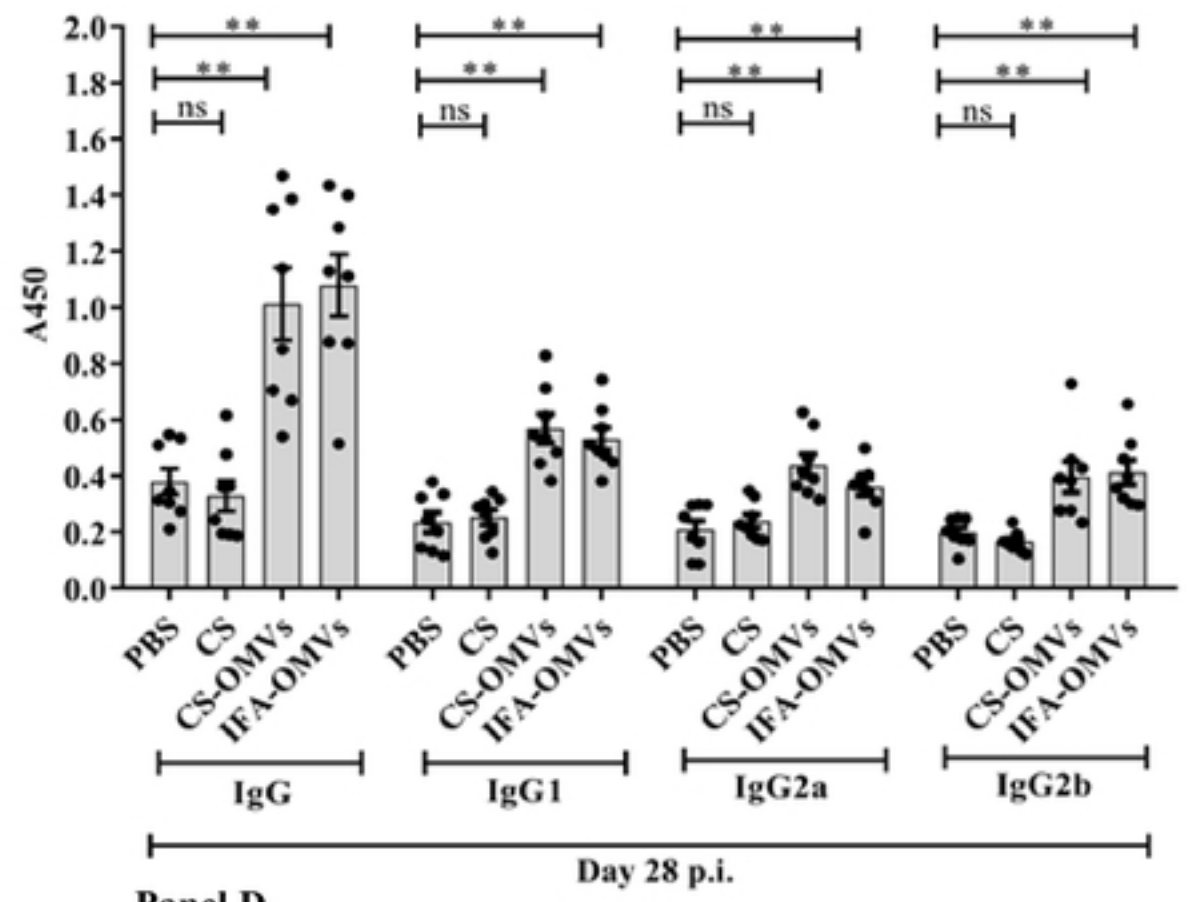

Panel D

Figure 3

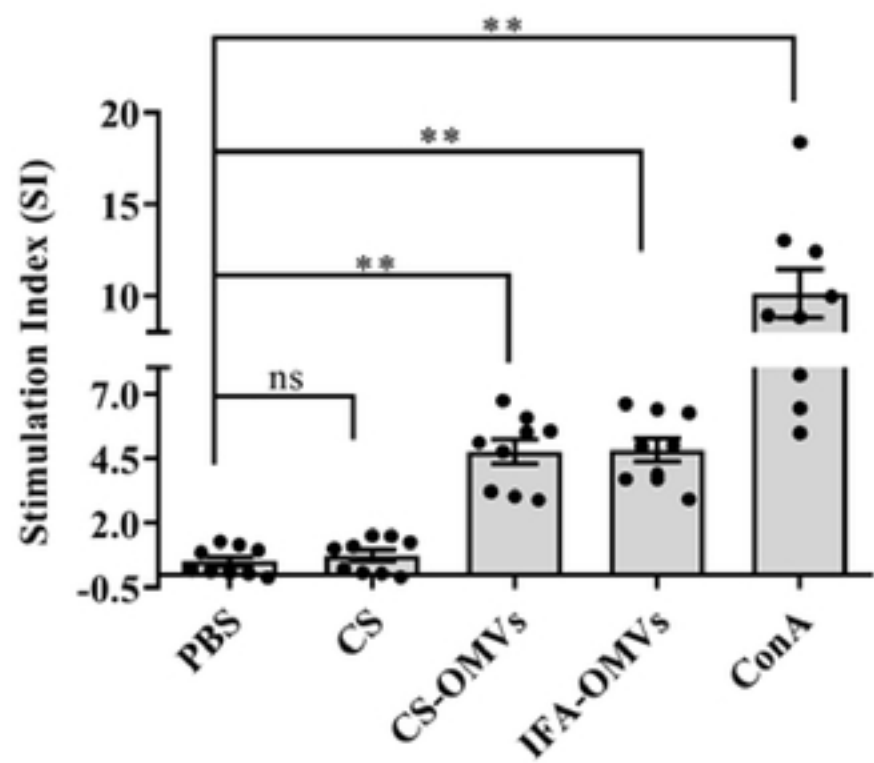

Panel A

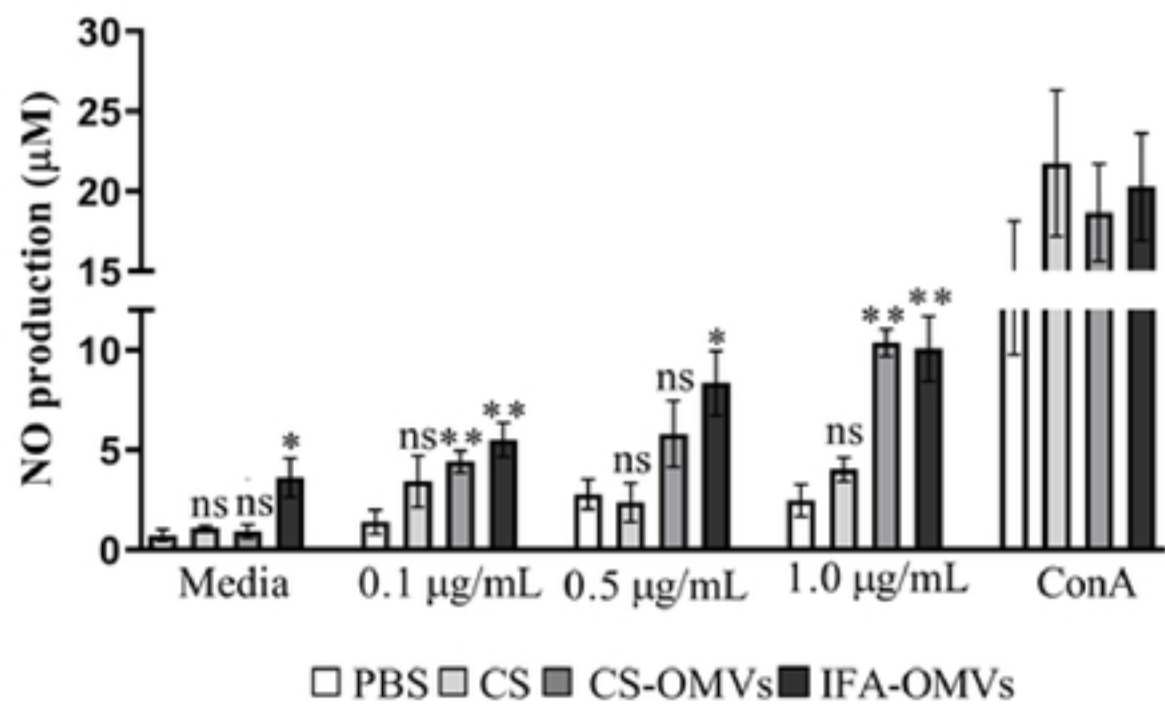

Panel B

Figure 4



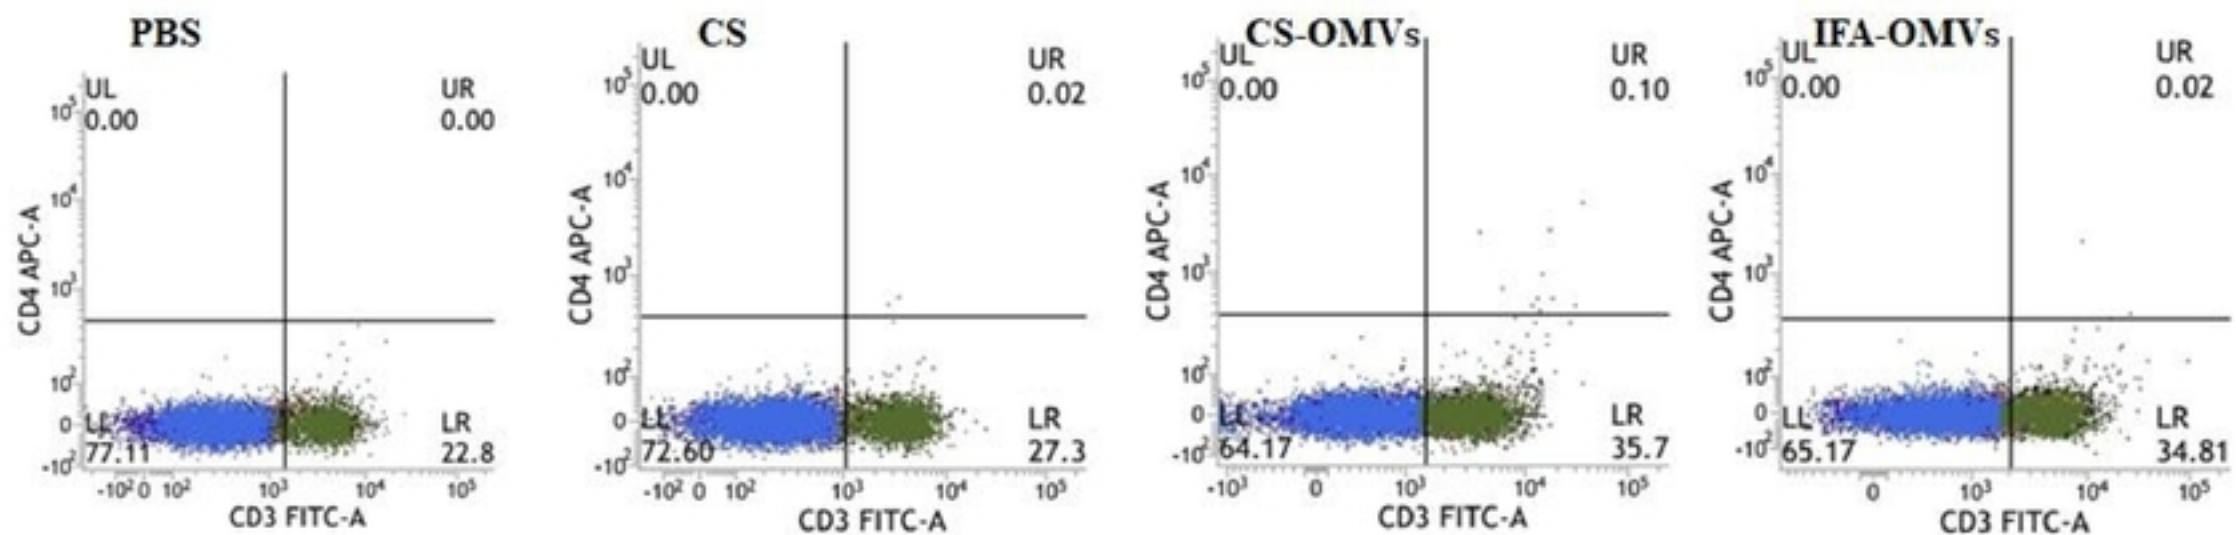

**Panel A**

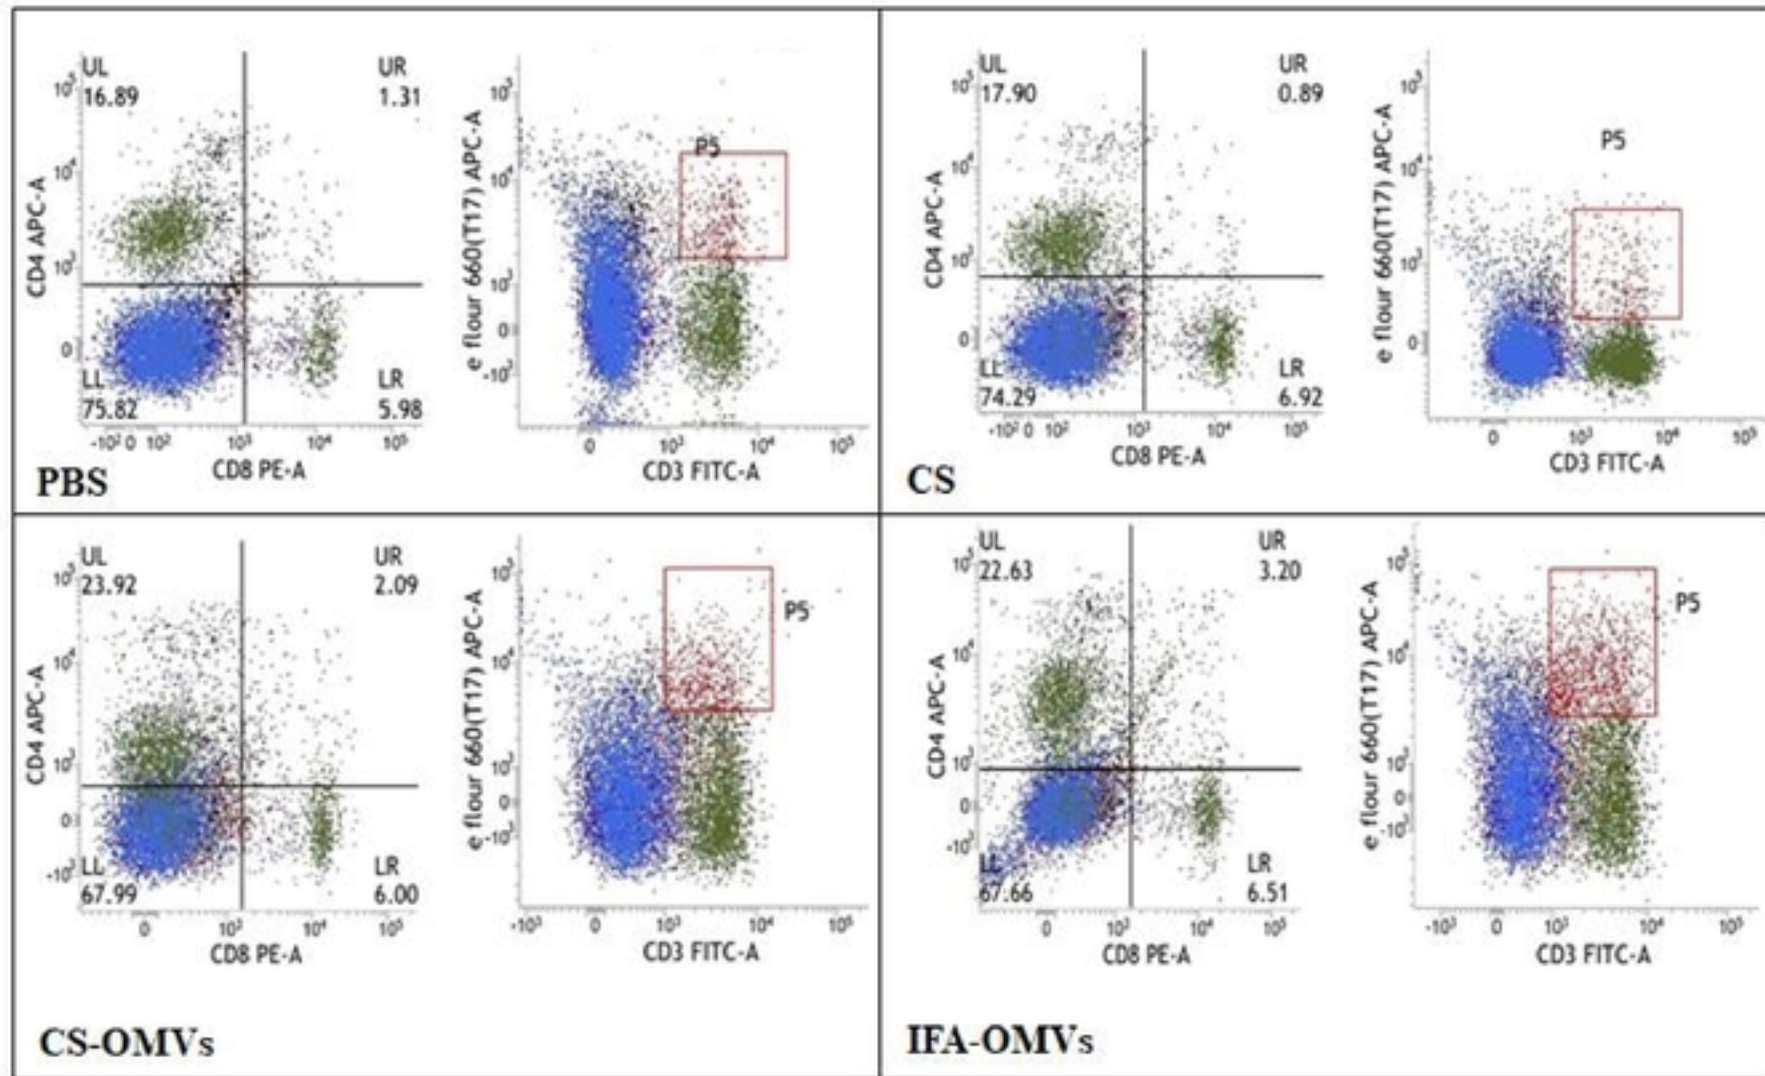

**Panel B**

**Figure 5**

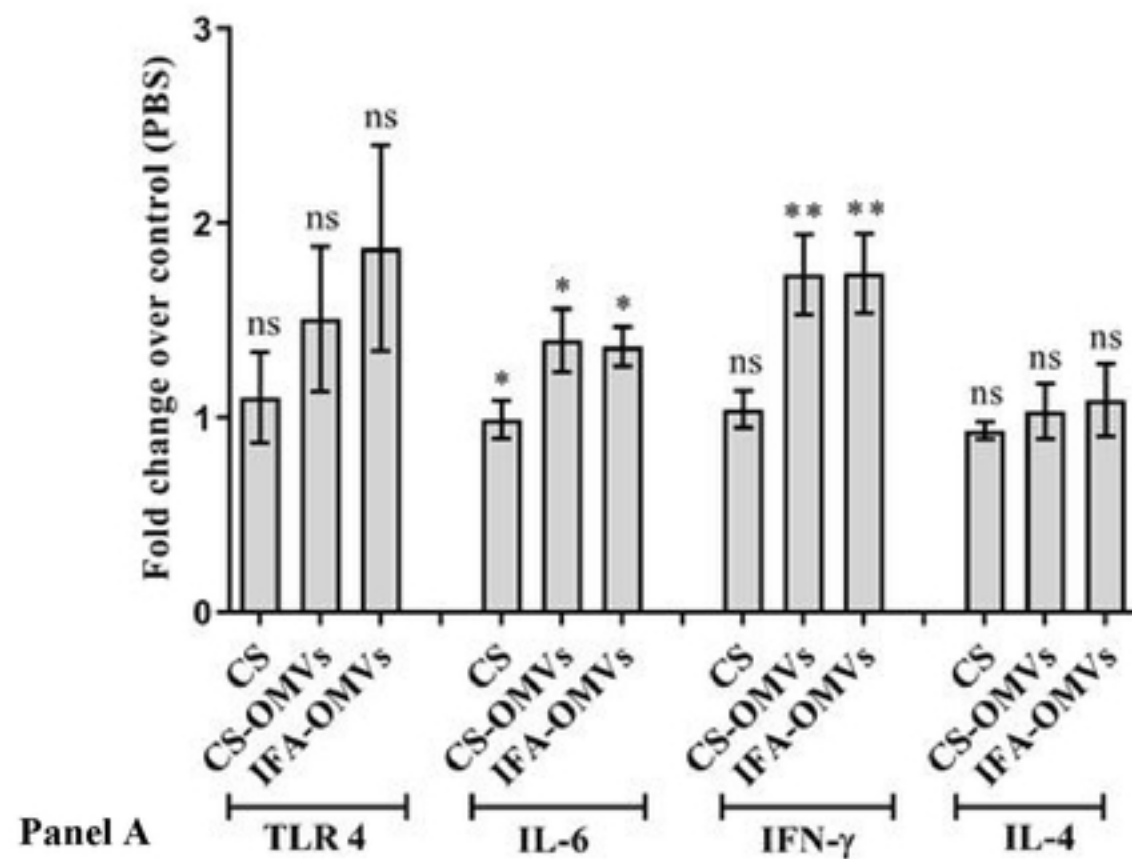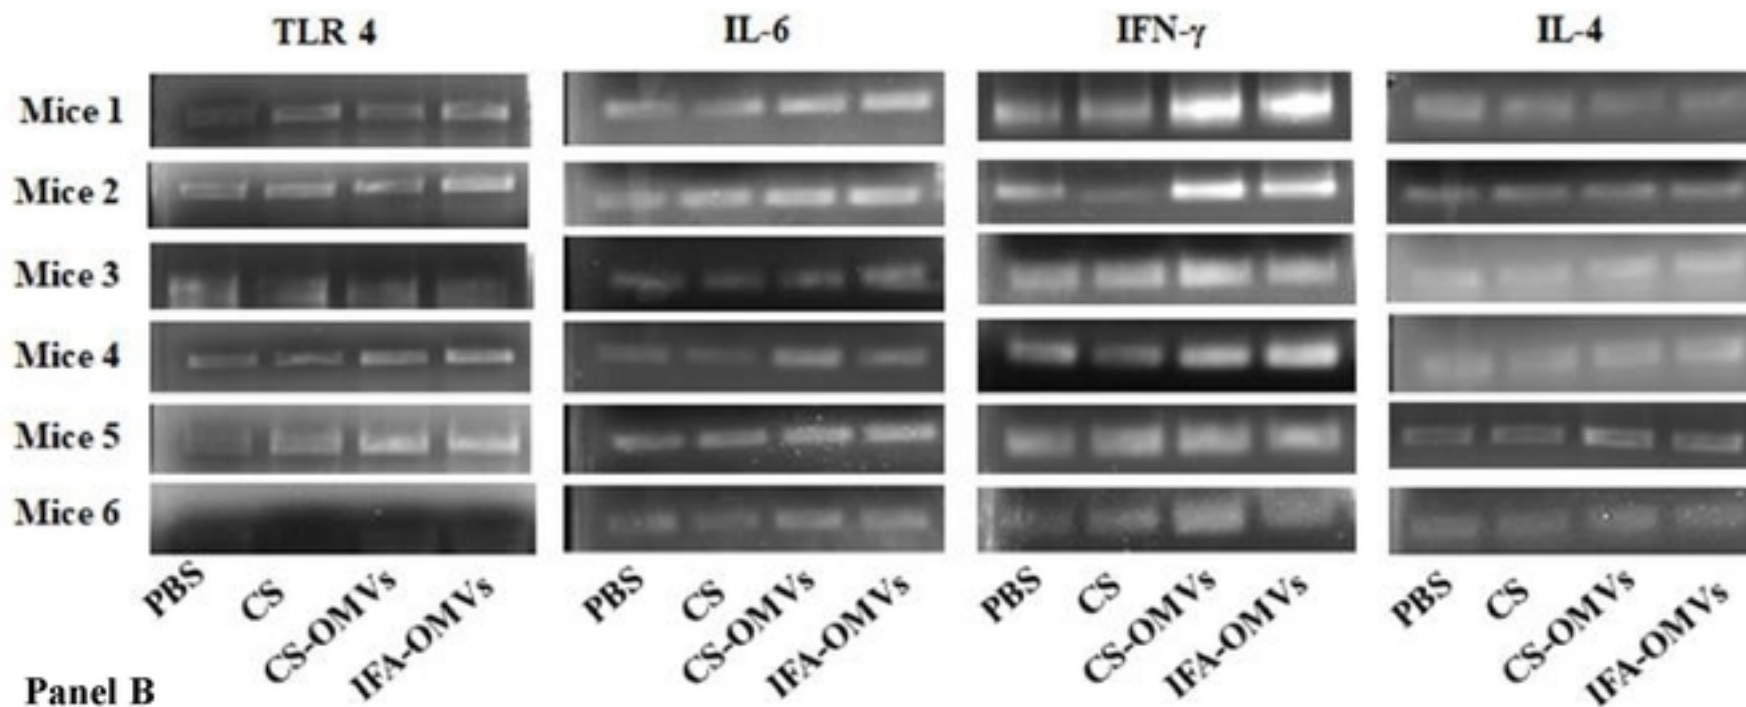

**Figure 6**

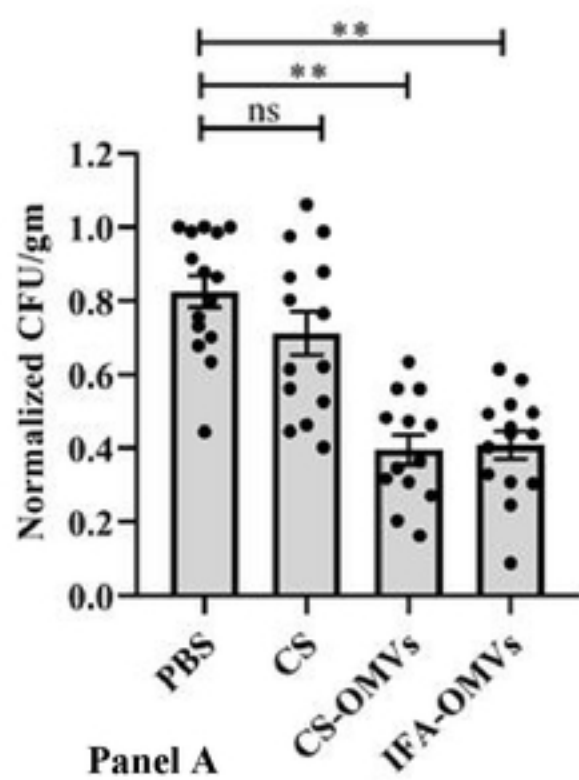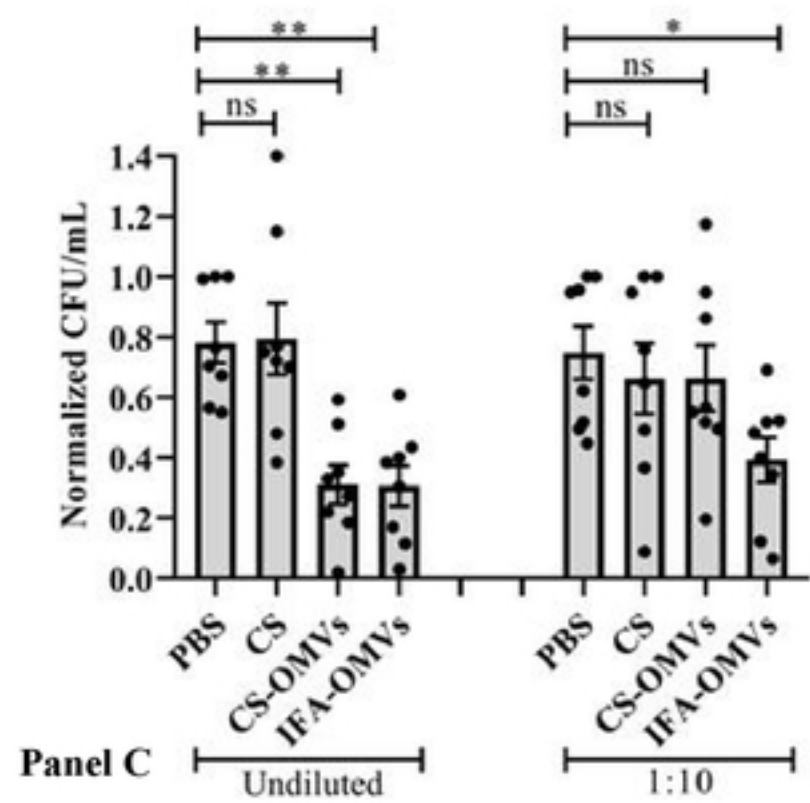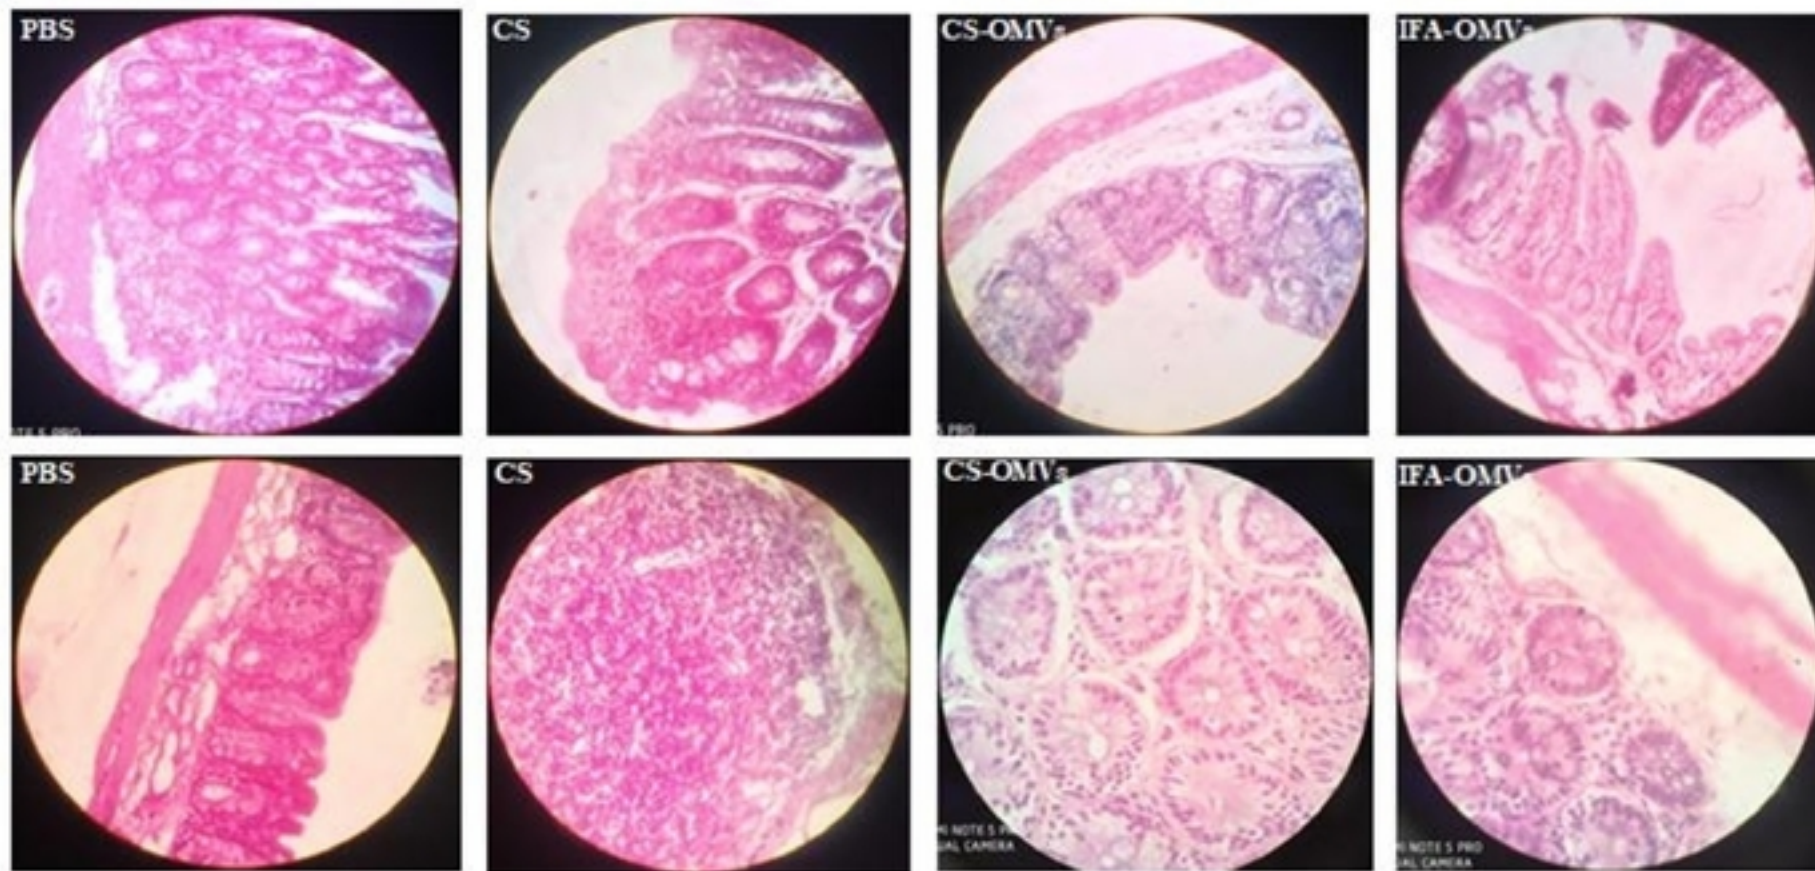

**Figure 7**
